# Supplementary material for: Different Secondary Metabolite Profiles of Phylogenetically almost Identical Streptomyces griseus Strains Originating from Geographically Remote Locations
Source: PubMed Central journal article supplement (PMC6616549; doi:10.3390/microorganisms7060166), 2019-06-06
Supplement: microorganisms-07-00166-s001.pdf [file microorganisms-07-00166-s001.pdf]

Article

# Different secondary metabolite profiles of phylogenetically almost identical *Streptomyces griseus* strains originating from geographically remote locations

Ignacio Sottorff<sup>1,2</sup>, Jutta Wiese<sup>1</sup>, Matthias Lipfert<sup>3</sup>, Nils Preußke<sup>3</sup>, Frank D. Sönnichsen<sup>3</sup>, and Johannes F. Imhoff<sup>1,\*</sup>

<sup>1</sup> GEOMAR Helmholtz Centre for Ocean Research Kiel, Marine Microbiology, 24105 Kiel, Germany; isottorff@geomar.de, jwiese@geomar.de, jimhoff@geomar.de

<sup>2</sup> Facultad de Ciencias Naturales y Oceanográficas, Universidad de Concepción, 4070386 Concepción, Chile.

<sup>3</sup> Otto Diels Institute for Organic Chemistry, University of Kiel, 24118 Kiel, Germany; fsoennichsen@oc.uni-kiel.de, mlipfert@oc.uni-kiel.de, npreusske@oc.uni-kiel.de \* Correspondence: jimhoff@geomar.de; Tel.: +49 431 600-4450

## Table of contents

|                                                                                              |    |
|----------------------------------------------------------------------------------------------|----|
| Alignment of 16S rRNA                                                                        | 1  |
| Summary table of <i>Streptomyces</i> dereplication-HRLCMS                                    | 2  |
| Supplementary material: dereplication-HRLCMS                                                 | 3  |
| Dereplication-HRLCMS of <i>Streptomyces</i> SN25_8.1                                         | 4  |
| Albidopyrone                                                                                 | 5  |
| Cyclizidine                                                                                  | 6  |
| Gancidin W                                                                                   | 7  |
| YF-0200-R-B                                                                                  | 8  |
| Emycin E                                                                                     | 9  |
| 6-beta-deoxy-5-hydroxy-tetracycline                                                          | 10 |
| Epithienamycin C                                                                             | 11 |
| SF-733 C                                                                                     | 12 |
| Cycloheximide                                                                                | 13 |
| Phenatic acid                                                                                | 14 |
| Netropsin                                                                                    | 15 |
| N-Valyldihydroxyhomoproline                                                                  | 16 |
| Actiphenol                                                                                   | 17 |
| TMC-86B                                                                                      | 18 |
| Protomycin                                                                                   | 19 |
| Unknown                                                                                      | 20 |
| Dereplication-HRLCMS of <i>Streptomyces griseus</i> subsp. <i>griseus</i> DSM 40236T         | 21 |
| Gancidin W                                                                                   | 22 |
| YF-0200-R-B                                                                                  | 23 |
| Emycin E                                                                                     | 24 |
| 6-beta-deoxy-5-hydroxy-tetracycline                                                          | 25 |
| Fortimicin KK1                                                                               | 26 |
| Phenatic acid                                                                                | 27 |
| Netropsin                                                                                    | 28 |
| Actiphenol                                                                                   | 29 |
| TMC-86B                                                                                      | 30 |
| Capromycin                                                                                   | 31 |
| Halstoctacosanolide B                                                                        | 32 |
| YO-7625                                                                                      | 33 |
| Unknown                                                                                      | 34 |
| <i>Streptomyces griseus</i> 16S rRNA comparison                                              | 35 |
| Phylogenetic results: <i>Streptomyces</i> sp. SN25_8.1                                       | 36 |
| Phylogenetic results: <i>Streptomyces griseus</i> subsp. <i>griseus</i> DSM 40236T           | 42 |
| Antibiotic test                                                                              | 48 |
| HPLC-ELSD Abundance profile for <i>Streptomyces</i> sp. SN25_8.1                             | 49 |
| HPLC-ELSD Abundance profile for <i>Streptomyces griseus</i> subsp. <i>griseus</i> DSM 40236T | 50 |

```

Easter_Island 1 UGAGUUUGAUCUUGGUCAGGACGAACCGUUGGGGGCCUUAACACAUUGCAAGUCGAACGAUGAAGCCUUUCGGGUGGAUUAGUGGC
Russia 1 -GAGUUUGAUCUUGGUCAGGACGAACCGUUGGGGGCCUUAACACAUUGCAAGUCGAACGAUGAAGCCUUUCGGGUGGAUUAGUGGC

Easter_Island 91 AACGGGUGAGUAACACGUGGGCAAUCUGCCUUUCACUUGGGACAAGCCUGGAAACGGGUCUAAUACCGGAUAACACUCUGUCCGCA
Russia 90 AACGGGUGAGUAACACGUGGGCAAUCUGCCUUUCACUUGGGACAAGCCUGGAAACGGGUCUAAUACCGGAUAACACUCUGUCCGCA

Easter_Island 181 UGGACGGGUAUAAAGCUCGCGCGUGAAGGAUGAGCCCGCGCCUUCAGCUUUGUGGUGGGUAUUGGCCUACCAAGGGACGACGG
Russia 180 UGGACGGGUAUAAAGCUCGCGCGUGAAGGAUGAGCCCGCGCCUUCAGCUUUGUGGUGGGUAUUGGCCUACCAAGGGACGACGG

Easter_Island 271 GUAGCCGGCCUGAGAGGGCGACCGCCACACUGGGACUGAGACACGGCCAGACUCUACGGGAGGCAGAGUGGGAAUUAUUGCAAAU
Russia 270 GUAGCCGGCCUGAGAGGGCGACCGCCACACUGGGACUGAGACACGGCCAGACUCUACGGGAGGCAGAGUGGGAAUUAUUGCAAAU

Easter_Island 361 GGGCGAAAGCCUGAUGCAGCGACCGCCUGAGGGAUGACGGCCUUCGGGUUUAUAAACCUUUUUCAGAGGGAAAGCGAGAGUGACGG
Russia 360 GGGCGAAAGCCUGAUGCAGCGACCGCCUGAGGGAUGACGGCCUUCGGGUUUAUAAACCUUUUUCAGAGGGAAAGCGAGAGUGACGG

Easter_Island 451 UACUGGAGAAAGAGCCCGCCUAAUCUUGCGGACACCGCCGUAUUCUUGAGGGCCAGCCUUUCGCGAAUUUUUGGGCUAAAG
Russia 450 UACUGGAGAAAGAGCCCGCCUAAUCUUGCGGACACCGCCGUAUUCUUGAGGGCCAGCCUUUCGCGAAUUUUUGGGCUAAAG

Easter_Island 541 AGCUCGUGGGCCUUGUCACGUCGGAUUGAAAGCCCGGGGUUAACCCCGGUUCGCAUUCGAUACGGGUCAGUAGAGUUGGUAGG
Russia 540 AGCUCGUGGGCCUUGUCACGUCGGAUUGAAAGCCCGGGGUUAACCCCGGUUCGCAUUCGAUACGGGUCAGUAGAGUUGGUAGG

Easter_Island 631 GGGAUUCGAAUUCUUGGUUGAGCGUAAAUCGCGAGAUUUCAGGAGGAACACCGUGCGAAGGCGGAUCUUGGGCCUUAUCGACG
Russia 630 GGGAUUCGAAUUCUUGGUUGAGCGUAAAUCGCGAGAUUUCAGGAGGAACACCGUGCGAAGGCGGAUCUUGGGCCUUAUCGACG

Easter_Island 721 CUGAGGAGCGAAAGCUGGGAGCGAACAGGAUUGAUACCCUGGUUUCACCGCCUUAACCUUGGAAUCAGUUGGGGACAUUCG
Russia 720 CUGAGGAGCGAAAGCUGGGAGCGAACAGGAUUGAUACCCUGGUUUCACCGCCUUAACCUUGGAAUCAGUUGGGGACAUUCG

Easter_Island 811 AGCUCGUGGGUCGCGAGUAACGCAUUAAGUUUCCCCGCGGGGAGUACGGCCGCAAGGUUAAAACUCAAAGGAUUUGACGGGGCCG
Russia 810 AGCUCGUGGGUCGCGAGUAACGCAUUAAGUUUCCCCGCGGGGAGUACGGCCGCAAGGUUAAAACUCAAAGGAUUUGACGGGGCCG

Easter_Island 901 CACAAGCAGCGGAGCAUUGGGUUAUUUGACGCAACCGGAAGAACC UUACCAAGGCUUGACAUAUACCGGAAGCAUCAGAGAUGGUGG
Russia 900 CACAAGCAGCGGAGCAUUGGGUUAUUUGACGCAACCGGAAGAACC UUACCAAGGCUUGACAUAUACCGGAAGCAUCAGAGAUGGUGG

Easter_Island 991 CCCCCUUGGUGCGGUUACAGGUGGUGCAUGGGUUCGUCAGUCGUGUGCGAGAUUGUUGGUUAAUGCCCGCAACGAGCGCAACCCU
Russia 990 CCCCCUUGGUGCGGUUACAGGUGGUGCAUGGGUUCGUCAGUCGUGUGCGAGAUUGUUGGUUAAUGCCCGCAACGAGCGCAACCCU

Easter_Island 1081 UUUUUUUUUUCCACCAUUCUUUGGGUGAUGGGGACUCACAGGAGACUGCCGGGUCAACUCGGAGGAAGUUGGGGACGACGUCAA
Russia 1080 UUUUUUUUUUCCACCAUUCUUUGGGUGAUGGGGACUCACAGGAGACUGCCGGGUCAACUCGGAGGAAGUUGGGGACGACGUCAA

Easter_Island 1171 GUUUAUUGGGUUUUUUUUUUUGGGUGGACACGUGCUUACAAUUGGGGUUACAAUUGAGCUUGGUAUGGGGAGGGGAGGCAUUUCAAA
Russia 1170 GUUUAUUGGGUUUUUUUUUUUGGGUGGACACGUGCUUACAAUUGGGGUUACAAUUGAGCUUGGUAUGGGGAGGGGAGGCAUUUCAAA

Easter_Island 1261 AAGCCGUCUCAGUUCGGAUUUGGGUUCGCAACUCGACCCCAUGAAGUCGGGUUUCUAGUAUUCGCAGAUACGCAUUGGUGCGUGAAU
Russia 1260 AAGCCGUCUCAGUUCGGAUUUGGGUUCGCAACUCGACCCCAUGAAGUCGGGUUUCUAGUAUUCGCAGAUACGCAUUGGUGCGUGAAU

Easter_Island 1351 ACGUUCGGGGCCUUGUACACACCGCCGUCACGUCACGAAAGUCGGUAACACCCGAAAGCCGUGGCCCAACCCUUGUGGGAGGGAGCU
Russia 1350 ACGUUCGGGGCCUUGUACACACCGCCGUCACGUCACGAAAGUCGGUAACACCCGAAAGCCGUGGCCCAACCCUUGUGGGAGGGAGCU

Easter_Island 1441 GUCGAAGGUGGGACUGGGCAUUGGACGAAGUCGUAAAC
Russia 1440 GUCGAAGGUGGGACUGGGCAUUGGACGAAGUCGUAAAC

```

**Supplementary Figure 1** Alignment of the 16S rRNA gene sequences of two *Streptomyces* strains. Easter Island: *Streptomyces* sp. SN25\_8.1 (NCBI access# MK734066), Russia: *Streptomyces griseus* subsp. griseus DSM 40236<sup>T</sup> (NCBI access# MK734067)

# Dereplication - HRLCMS

**Table 1** Dereplication overview

| <i>Streptomyces</i> sp. SN25_8.1 |           |                             | <i>Streptomyces griseus</i> subsp. <i>griseus</i> DSM 40236 $\tau$ |           |                       |
|----------------------------------|-----------|-----------------------------|--------------------------------------------------------------------|-----------|-----------------------|
| rt                               | mass      | compounds                   | rt                                                                 | mass      | compounds             |
| 3.1                              | 259.0844  | Albidopyrone                |                                                                    |           |                       |
| 5.38                             | 292.19019 | Cyclizidine                 |                                                                    |           |                       |
| 8.58                             | 211.14388 | Gancidin W                  | 8.58                                                               | 211.14388 | Gancidin W            |
| 9.33                             | 245.12811 | YF-0200-R-B                 | 9.33                                                               | 245.12811 | YF-0200-R-B           |
| 9.54                             | 311.13843 | Emycin E                    | 9.54                                                               | 311.13843 | Emycin E              |
| 10                               | 445.23267 | Tetracycline                | 10                                                                 | 445.23267 | Tetracycline          |
| 10.56                            | 315.13336 | Epithienamycin C            |                                                                    |           |                       |
|                                  |           |                             | 10.65                                                              | 367.26843 | Fortimicin KK1        |
| 11.33                            | 282.16956 | Cycloheximide               |                                                                    |           |                       |
| 11.6                             | 340.1748  | SF-733 C                    |                                                                    |           |                       |
| 12.39                            | 294.13306 | Phenatic acid               | 12.39                                                              | 294.13306 | Phenatic acid         |
| 13.12                            | 431.20593 | Netropsin                   | 13.12                                                              | 431.20593 | Netropsin             |
| 13.73                            | 261.18454 | N-Valyldihydroxyhomoproline |                                                                    |           |                       |
| 15.3                             | 276.12268 | Actiphenol                  | 15.3                                                               | 276.12268 | Actiphenol            |
| 17.26                            | 415.21118 | TMC-86B                     | 17.26                                                              | 415.21118 | TMC-86B               |
| 18.46                            | 352.2164  | Protomycin                  |                                                                    |           |                       |
|                                  |           |                             | 18.97                                                              | 669.47778 | Capromycin            |
|                                  |           |                             | 19.18                                                              | 831.60242 | Halstoctacosanolide B |
|                                  |           |                             | 20.42                                                              | 889.64447 | YO-7625               |
|                                  |           |                             | 24.98                                                              | 813.59229 | Unknown               |
| 24.8                             | 579.53381 | Unknown                     |                                                                    |           |                       |

# Supplementary material

---

*Dereplication - HRLCMS*

# Streptomyces sp. SN25\_8.1

RT: 0.00 - 35.00

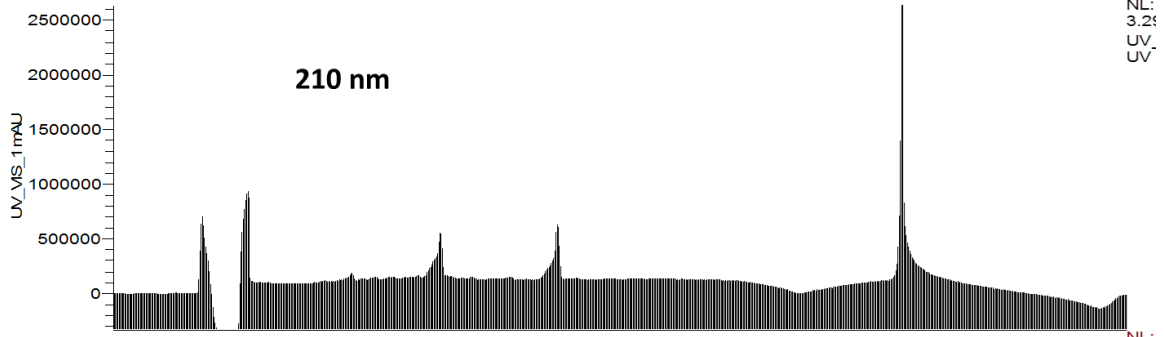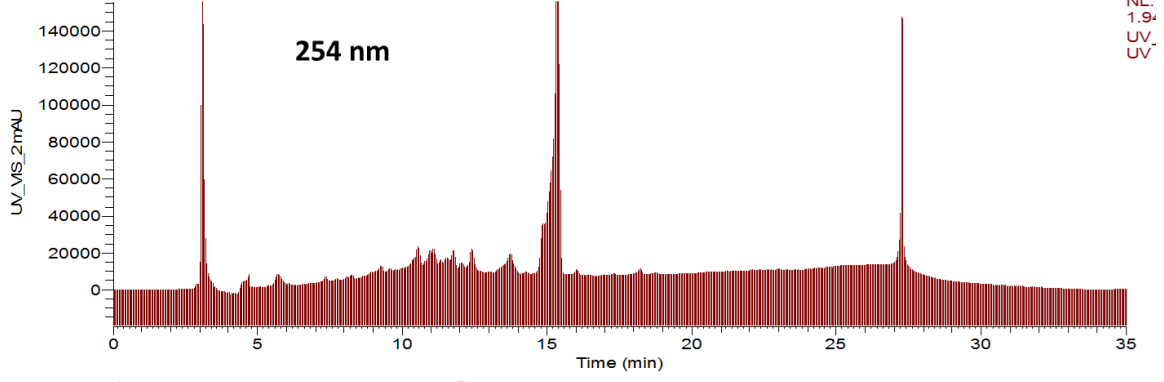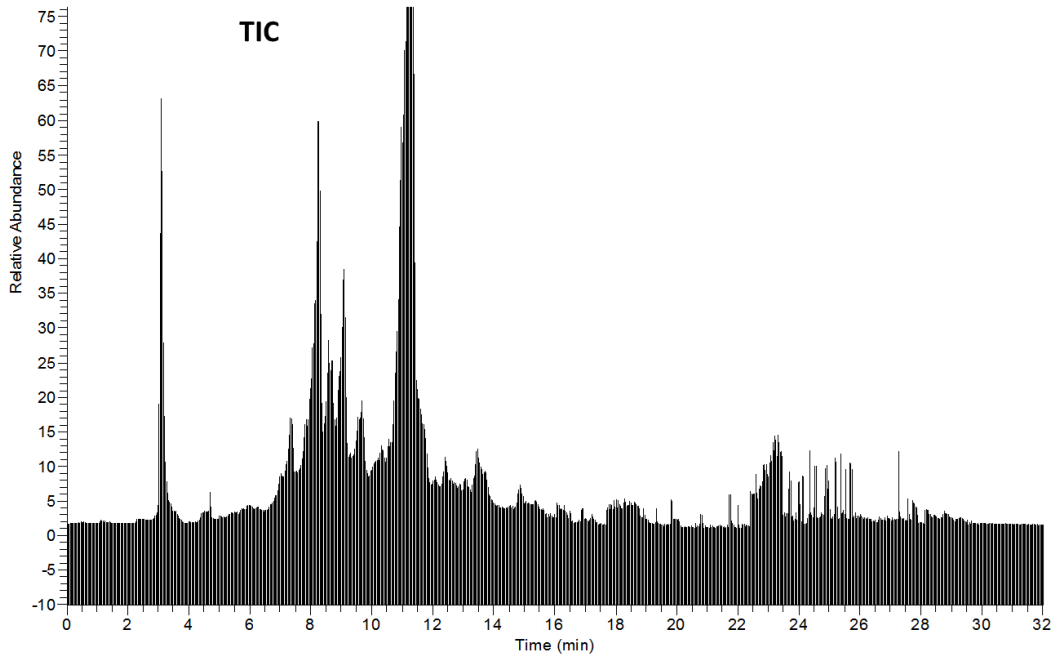

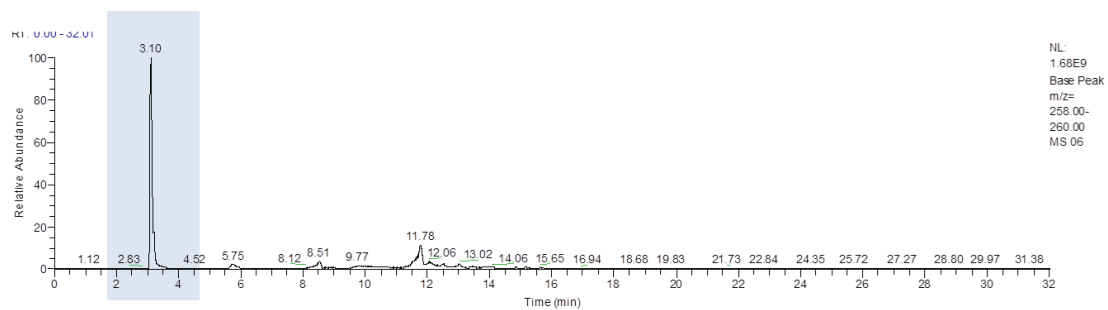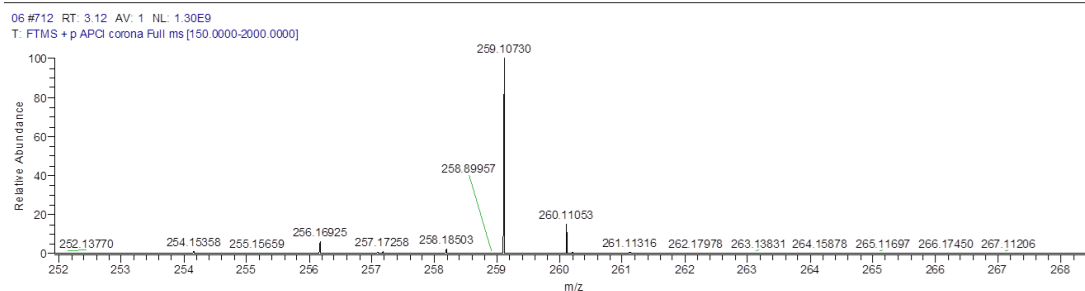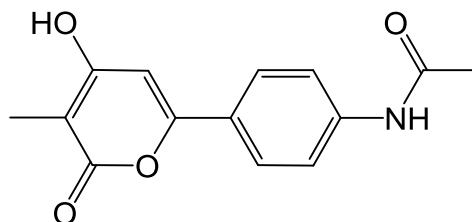

## Albidopyrone

Chemical Formula: C<sub>14</sub>H<sub>13</sub>NO<sub>4</sub>

Exact Mass: 259.08

Albidopyrone

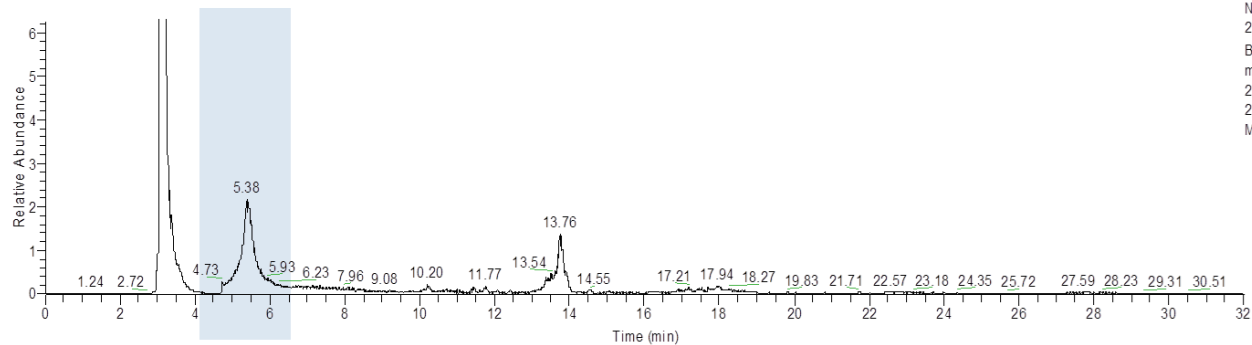

NL:  
2.20  
Base  
m/z=  
291  
292  
MS (

06 #1223 RT: 5.36 AV: 1 NL: 3.89E7  
T: FTMS + p APCI corona Full ms [150.0000-2000.0000]

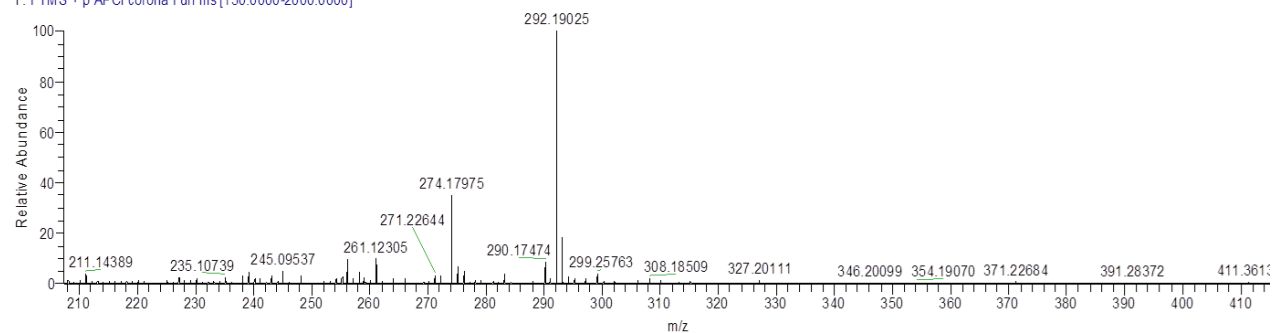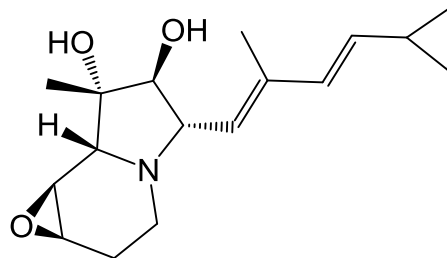

## Cyclizidine

Chemical Formula:  $C_{17}H_{25}NO_3$

Exact Mass: 291.18

Cyclizidine



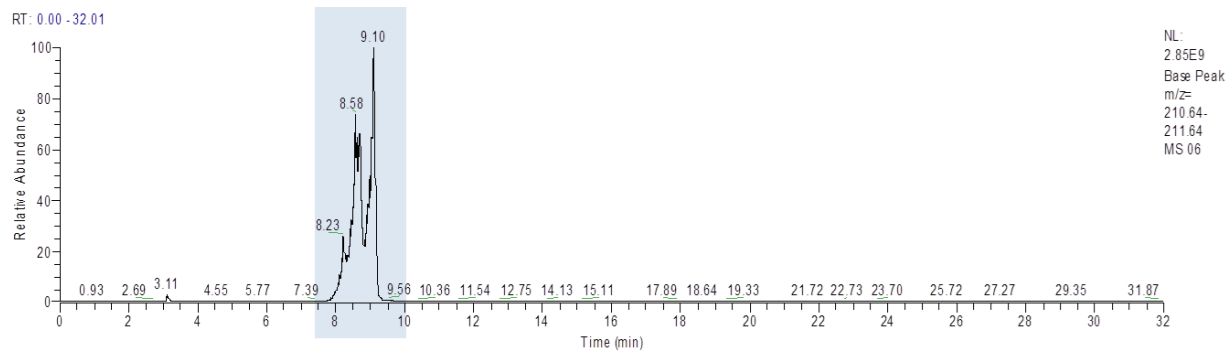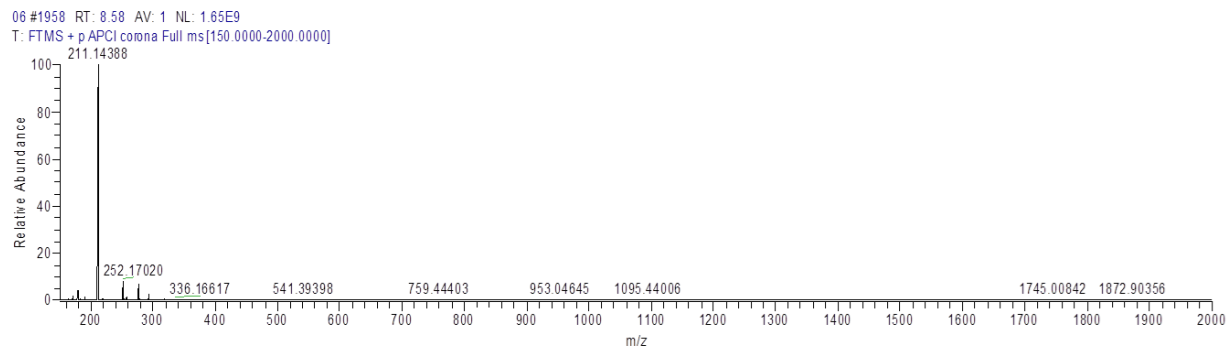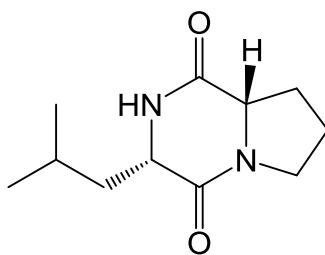

## Gancidin W

Chemical Formula:  $C_{11}H_{18}N_2O_2$

Exact Mass: 210.14

**Gancidin W**

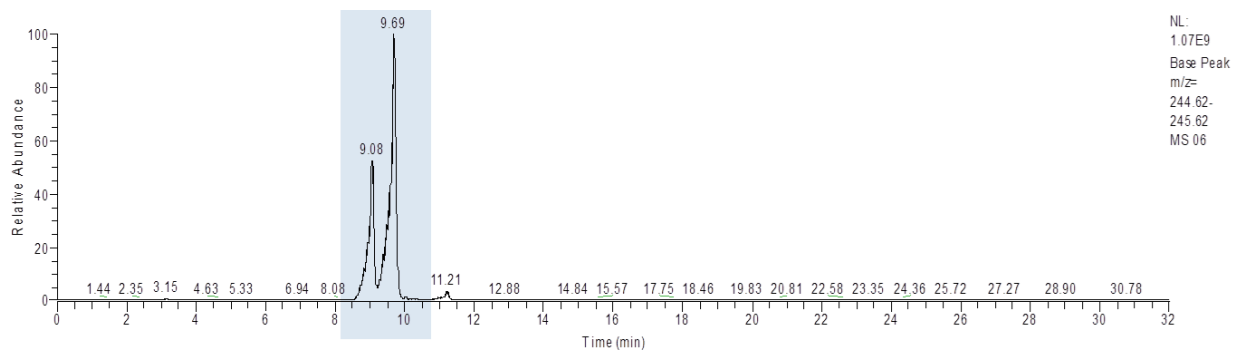

06 #2129 RT: 9.33 AV: 1 NL: 1.11E8  
 T: FTMS + p APCI corona Full ms [150.0000-2000.0000]

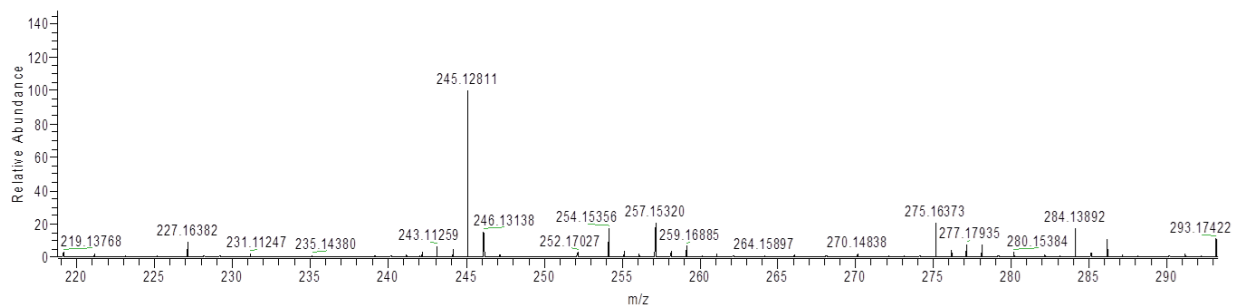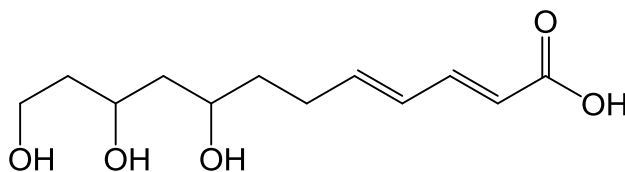

**YF-0200-R-B**

Exact Mass: 244.13  
 Molecular Weight: 244.29

**YF-0200-R-B**

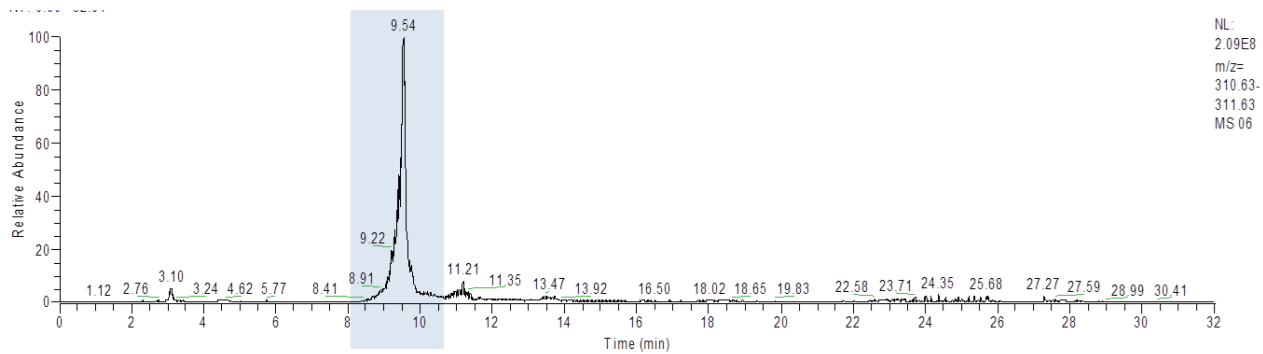

06 #2168 RT: 9.50 AV: 1 NL: 1.33E8  
 T: FTMS + p APCI corona Full ms [150.0000-2000.0000]

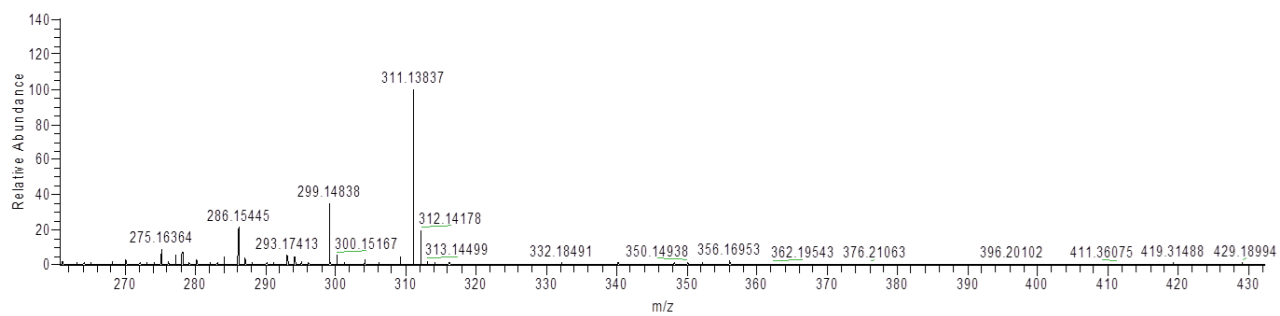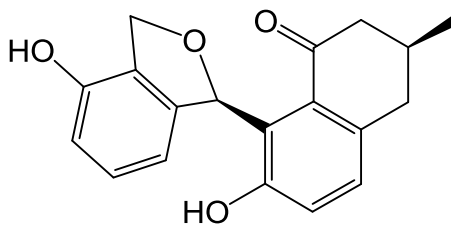

### Emycin-E

Chemical Formula:  $C_{19}H_{18}O_4$

Exact Mass: 310.12

Emycin E

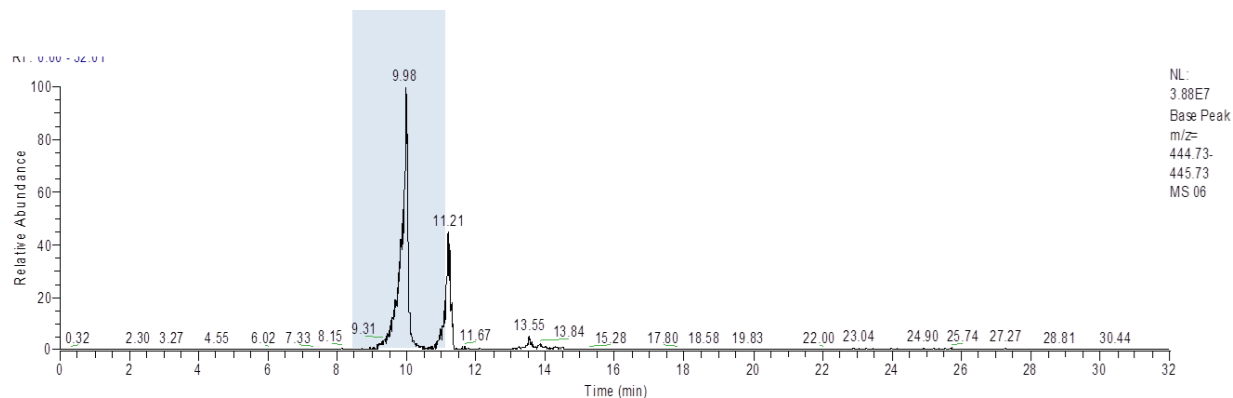

06 #2264 RT: 9.92 AV: 1 NL: 1.85E7  
 T: FTMS + p APCI corona Full ms[150.0000-2000.0000]

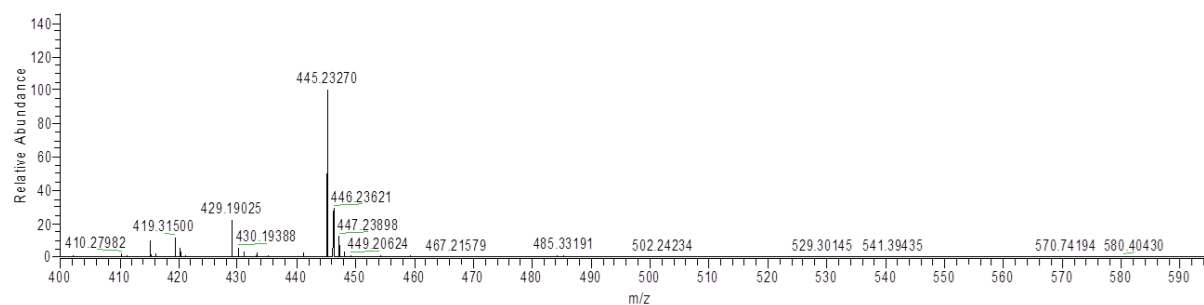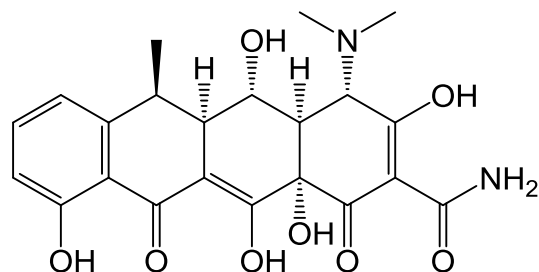

### 6-beta-deoxy-5-hydroxy-tetracycline

Chemical Formula:  $C_{22}H_{24}N_2O_8$

Exact Mass: 444.15

6-beta-deoxy-5-hydroxy-tetracycline

RT: 0.00 - 32.01

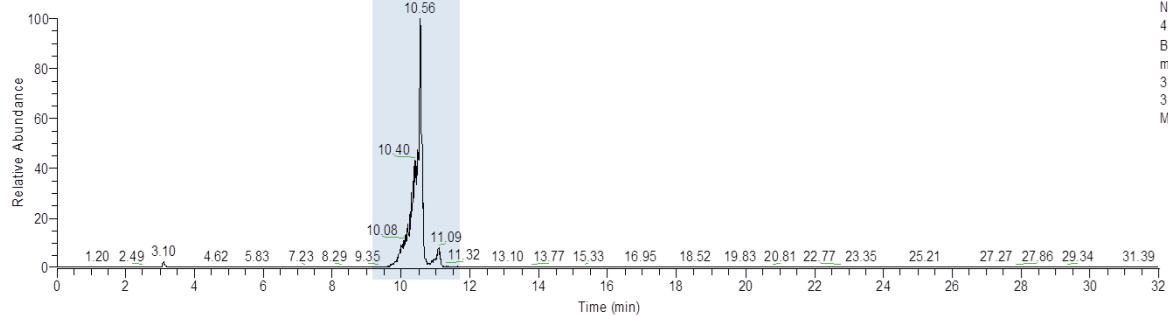

NL:  
4.87E8  
Base Peak  
m/z=  
314.63-  
315.63  
MS 06

06 #2386 RT: 10.45 AV: 1 NL: 1.59E8

T: FTMS + p APCI corona Full ms [150.0000-2000.0000]

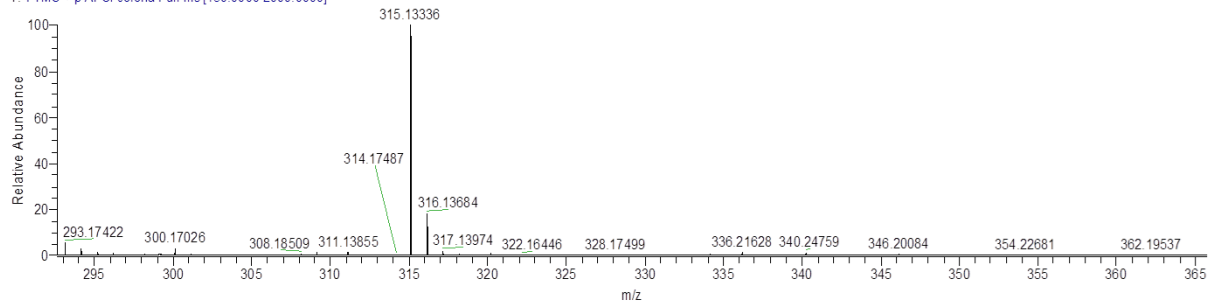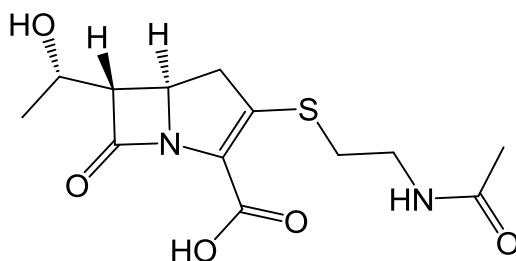

## Epithienamycin-C

Chemical Formula:  $C_{13}H_{18}N_2O_5S$

Exact Mass: 314.09

Epithienamycin C

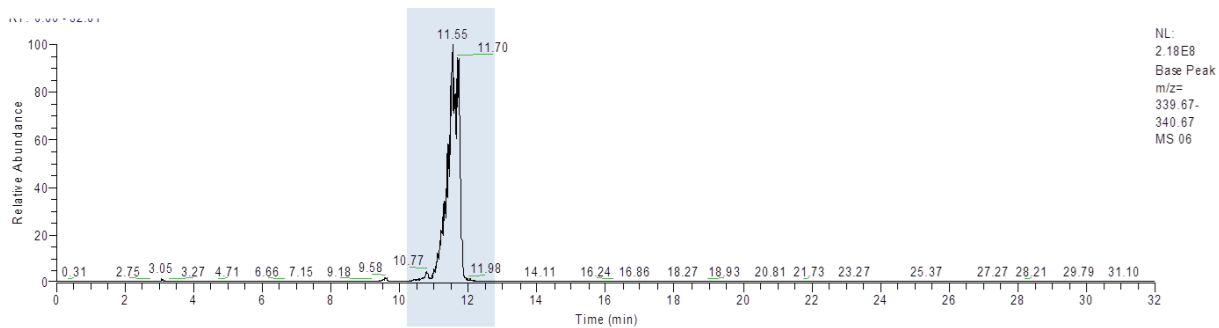

06 #2637 RT: 11.55 AV: 1 NL: 2.08E8  
 T: FTMS + p APCI corona Full ms [150.0000-2000.0000]

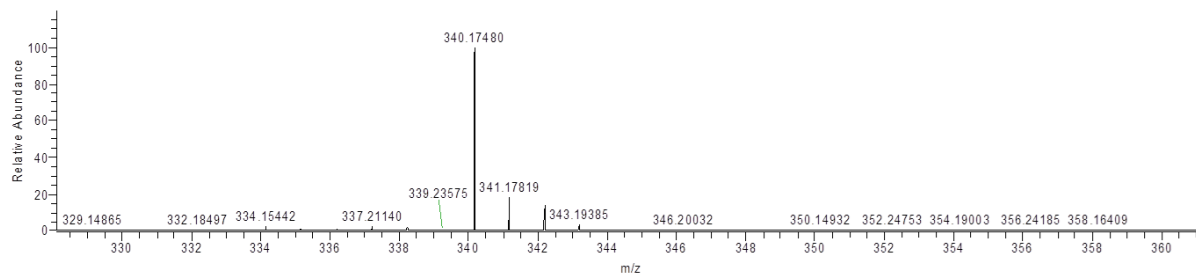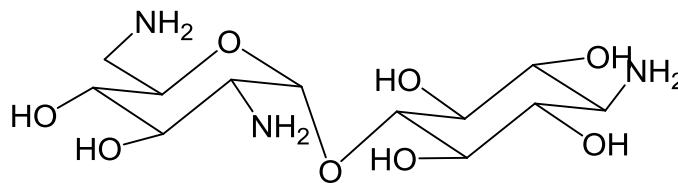

**SF-733C**

Chemical Formula:  $C_{12}H_{25}N_3O_8$

Exact Mass: 339.16

**SF-733 C**

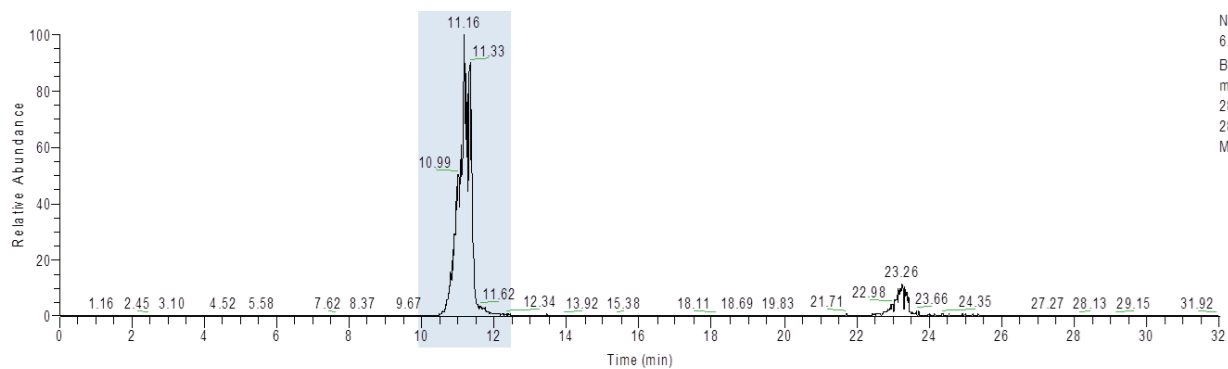

06 #2575 RT: 11.28 AV: 1 NL: 3.53E9  
 T: FTMS + p APCI corona Full ms [150.0000-2000.0000]

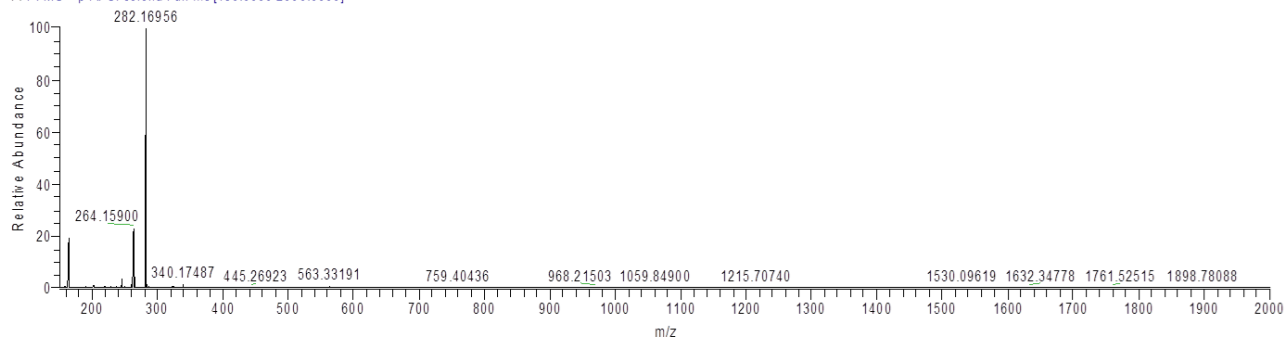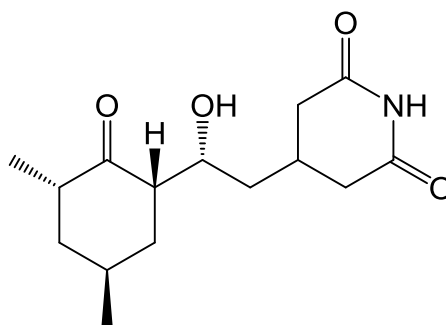

## Cycloheximide

Chemical Formula:  $C_{15}H_{23}NO_4$

Exact Mass: 281.16

Cycloheximide

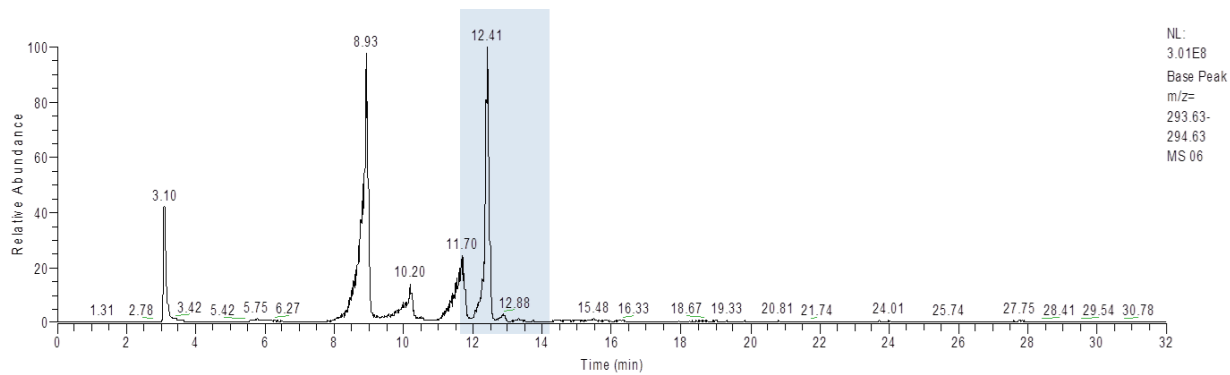

06 #2830 RT: 12.40 AV: 1 NL: 2.34E8  
T: FTMS + p APCI corona Full ms[150.0000-2000.0000]

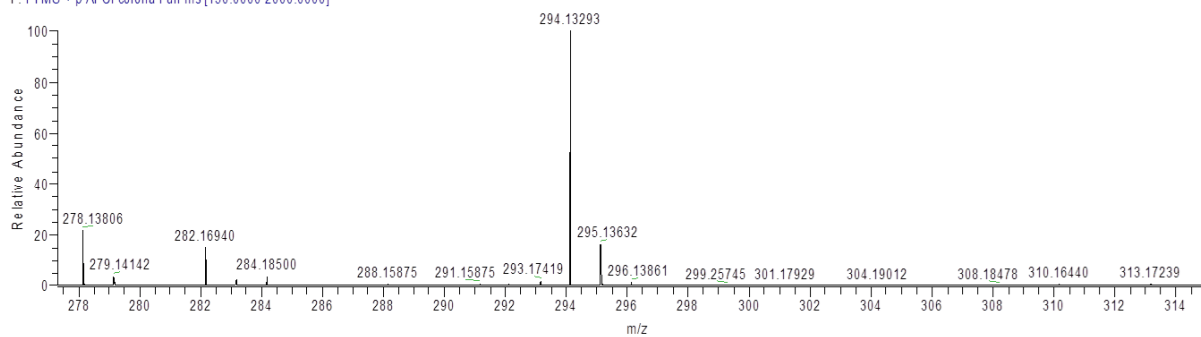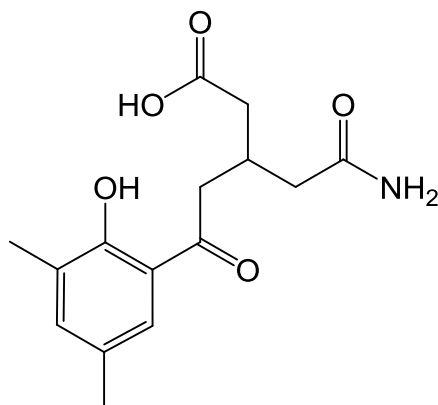

## Phenetic acid

Chemical Formula:  $C_{15}H_{19}NO_5$

Exact Mass: 293.13

Phenetic acid



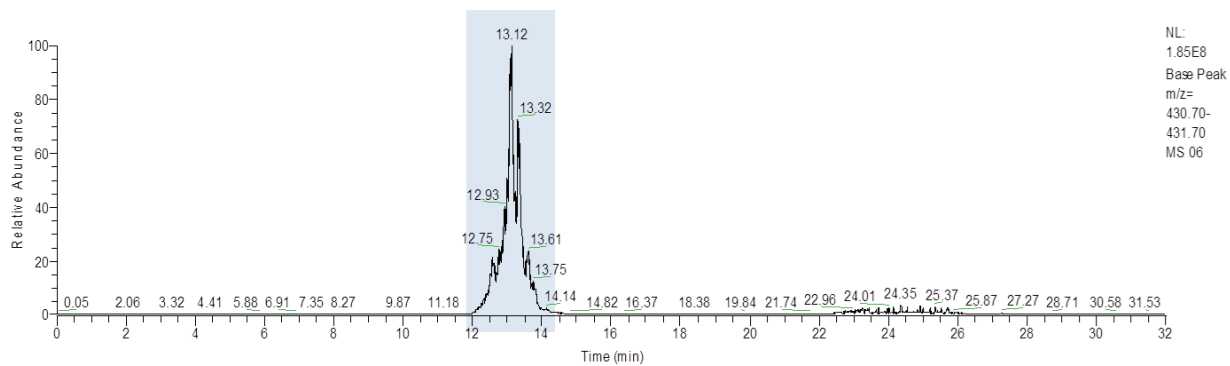

06 #2981 RT: 13.06 AV: 1 NL: 1.40E8  
 T: FTMS + p APCI corona Full ms [150.0000-2000.0000]

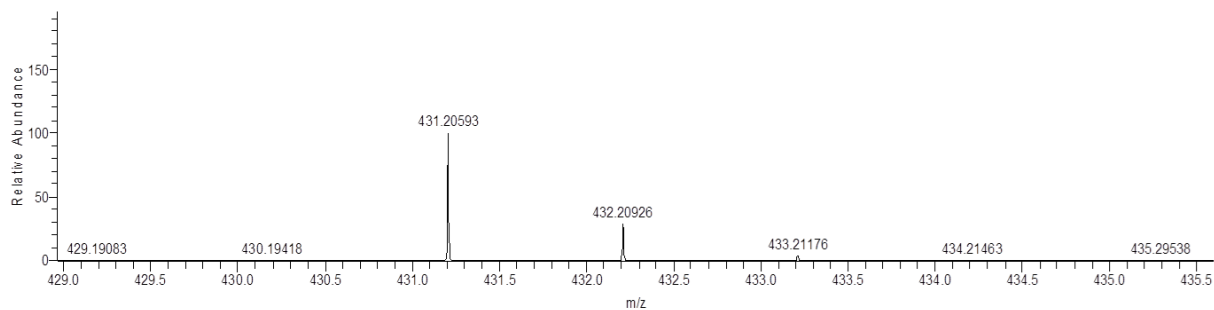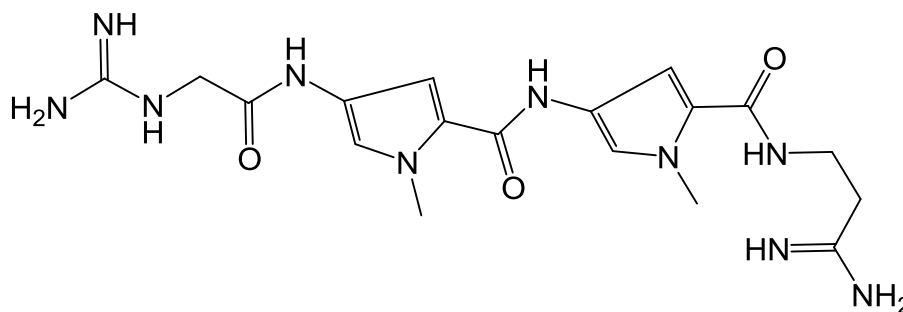

## Netropsin

Chemical Formula:  $C_{18}H_{26}N_{10}O_3$

Exact Mass: 430.22

Netropsin

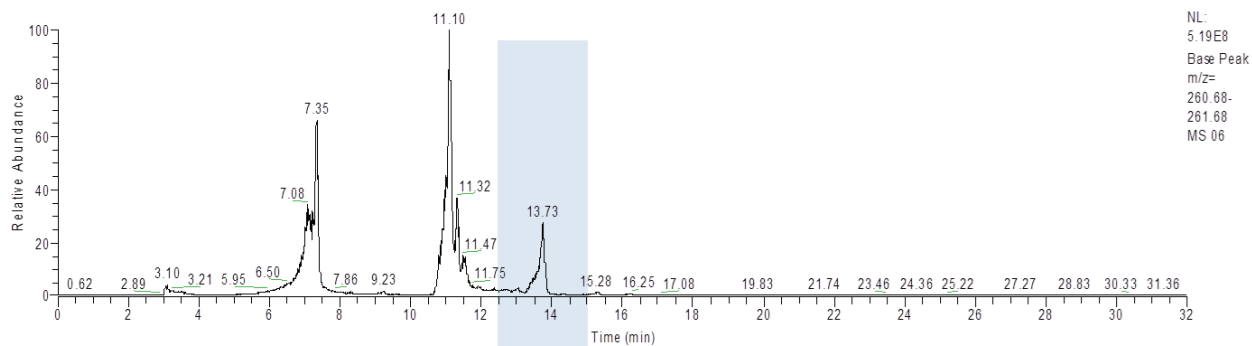

NL:  
5.19E8  
Base Peak  
m/z=  
260.68-  
261.68  
MS 06

06 #3122 RT: 13.68 AV: 1 NL: 7.63E7  
T: FTMS + p APCI corona Full ms [150.0000-2000.0000]

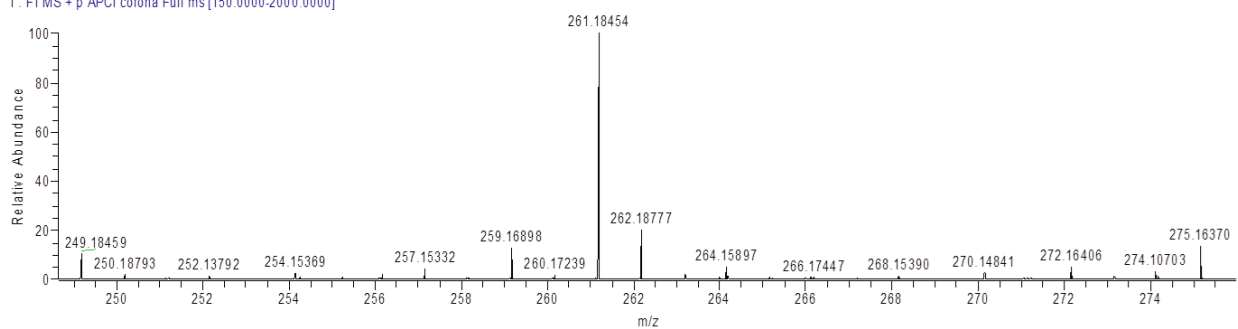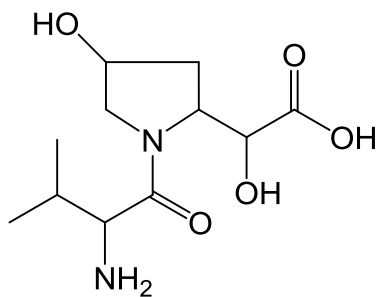

## N-Valyldihydroxyhomoproline

Chemical Formula:  $C_{11}H_{20}N_2O_5$

Exact Mass: 260.14

## N-Valyldihydroxyhomoproline

RT: 0.00 - 32.01

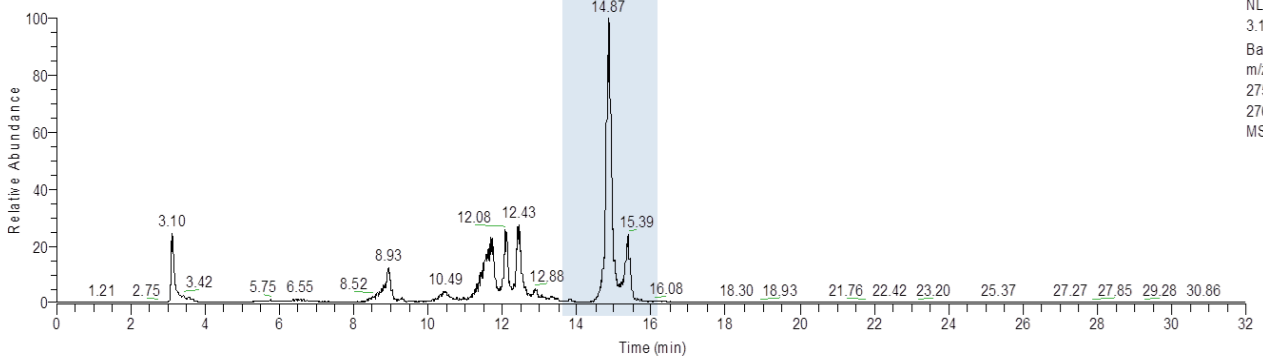

NL:  
3.15E8  
Base Peak  
m/z=  
275.50-  
276.50  
MS 06

06 #3483 RT: 15.26 AV: 1 NL: 276E7  
T: FT MS + p APCI corona Full ms [150.0000-2000.0000]

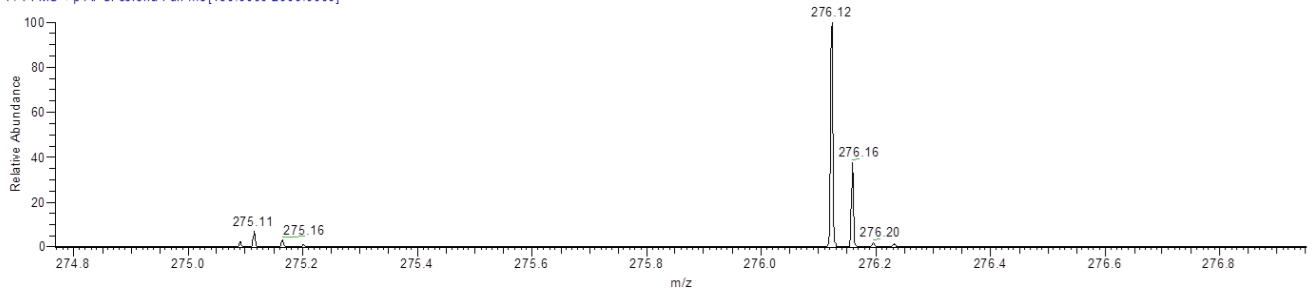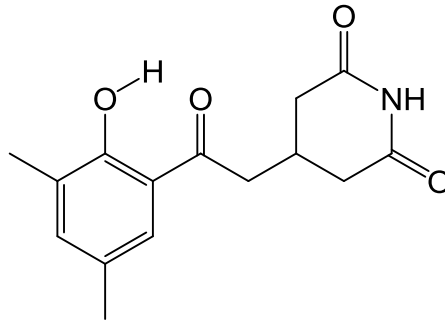

## Actiphenol

Chemical Formula:  $C_{15}H_{17}NO_4$

Exact Mass: 275.12

Actiphenol

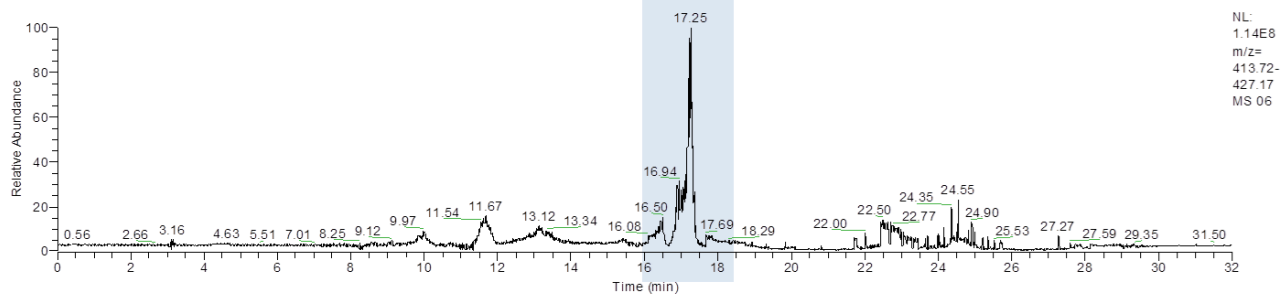

06 #3926 RT: 17.21 AV: 1 NL: 7.57E7  
 T: FTMS + p APCI corona Full ms [150.0000-2000.0000]

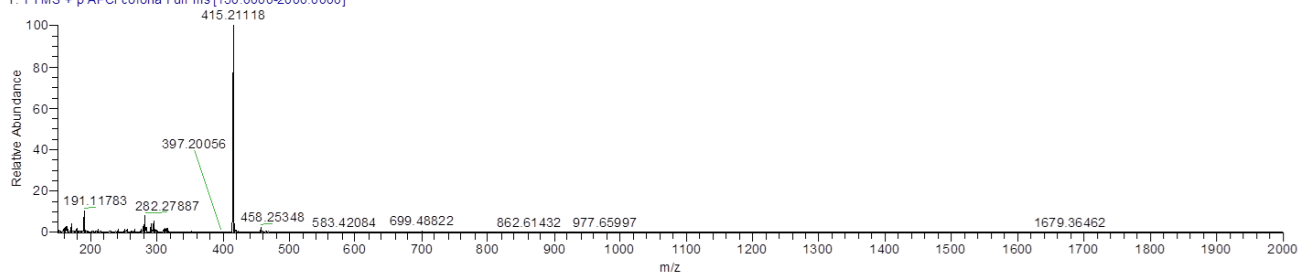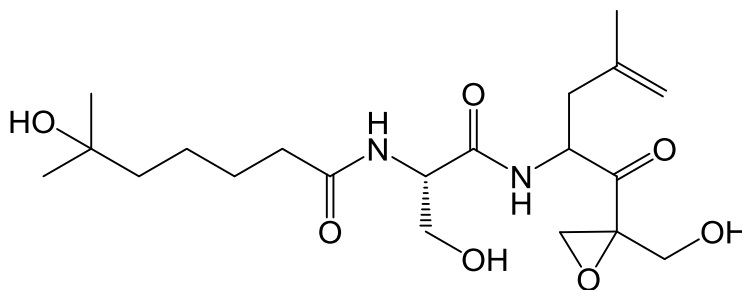

**TMC-86B**

Chemical Formula: C<sub>20</sub>H<sub>34</sub>N<sub>2</sub>O<sub>7</sub>

Exact Mass: 414.24

**TMC-86B**

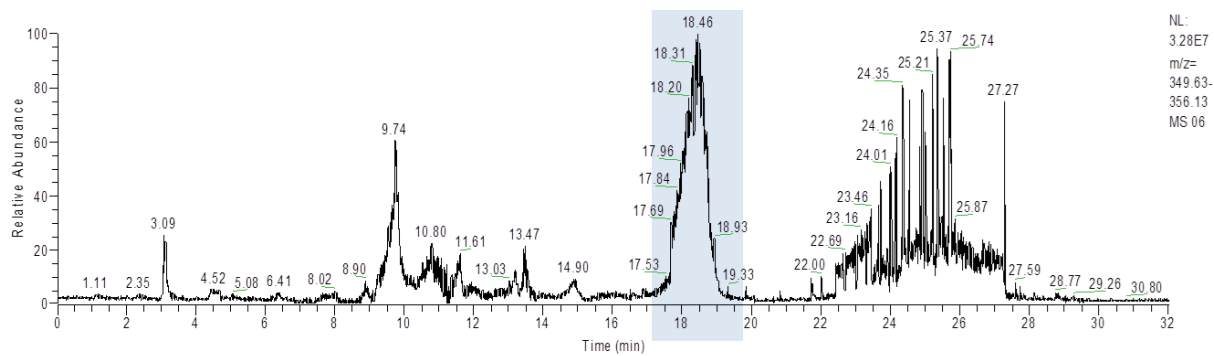

NL:  
3.28E7  
m/z=  
349.63-  
356.13  
MS 06

06 #4210 RT: 18.45 AV: 1 NL: 1.21E7  
T: FTMS + p APCI corona Full ms [150.0000-2000.0000]

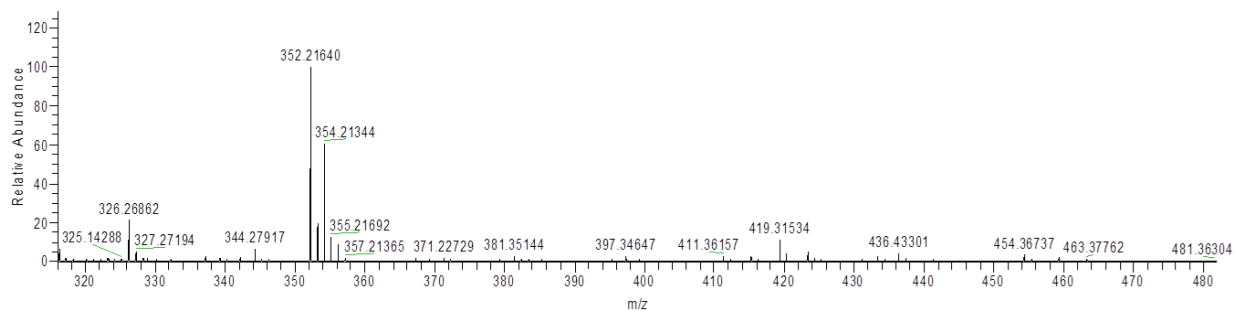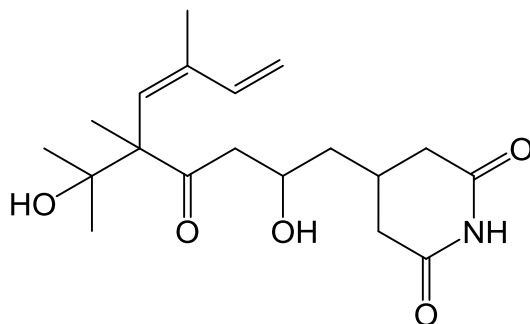

## Protomycin

Chemical Formula:  $C_{19}H_{29}NO_5$

Exact Mass: 351.20

Protomycin

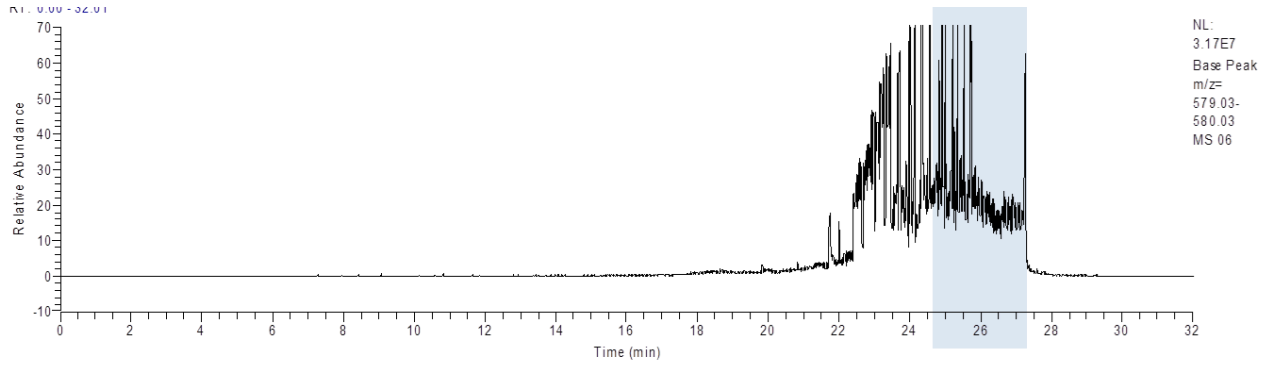

06 #6073 RT: 26.62 AV: 1 NL: 5.53E6  
T: FTMS + p APCI corona Full ms [150.0000-2000.0000]

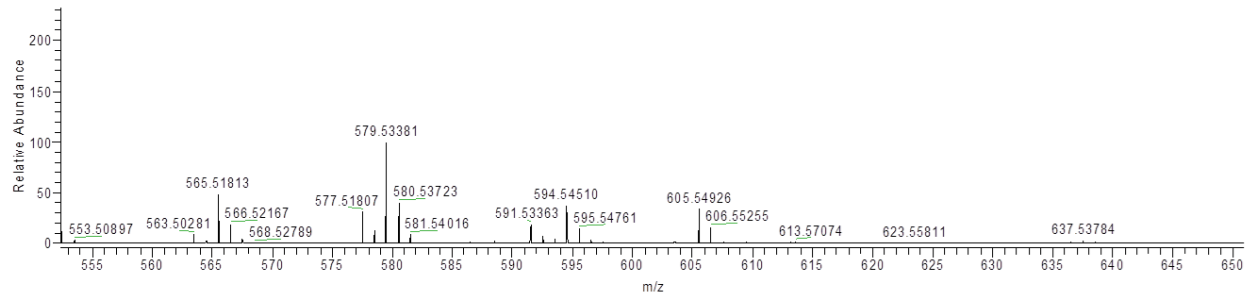

Unknown

# *Streptomyces griseus* subsp. *griseus* DSM 40236<sup>T</sup>

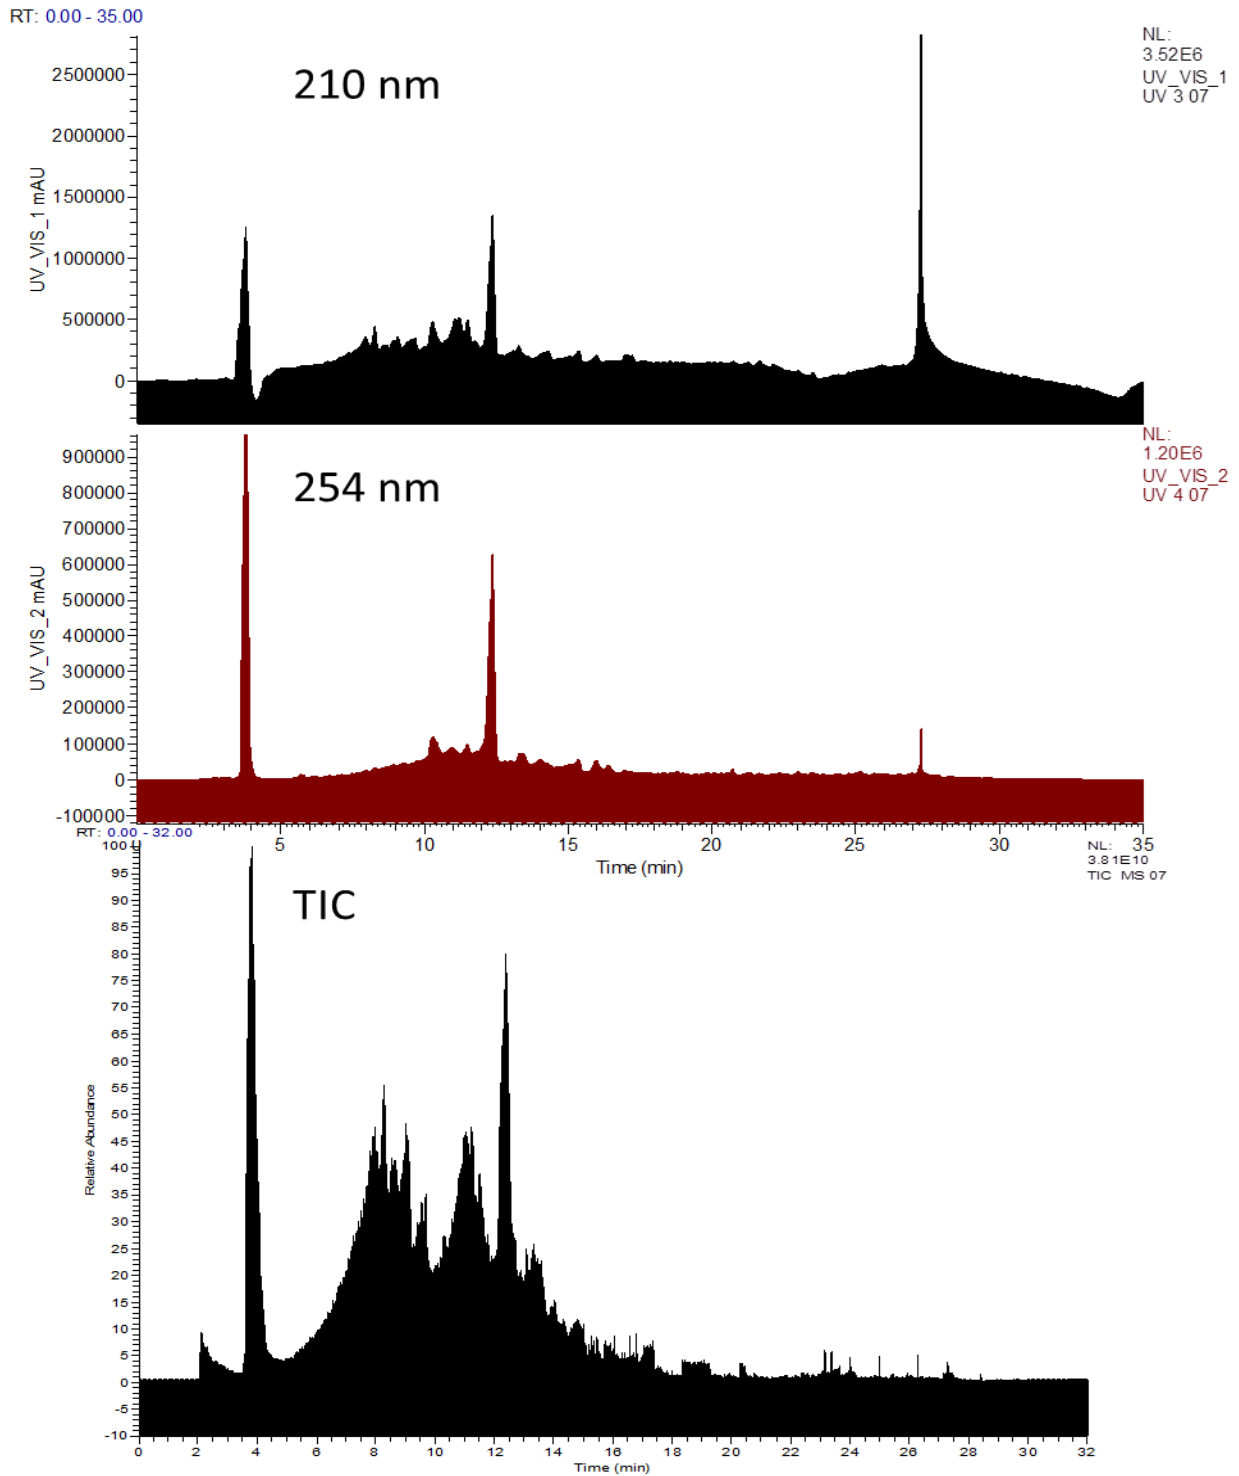

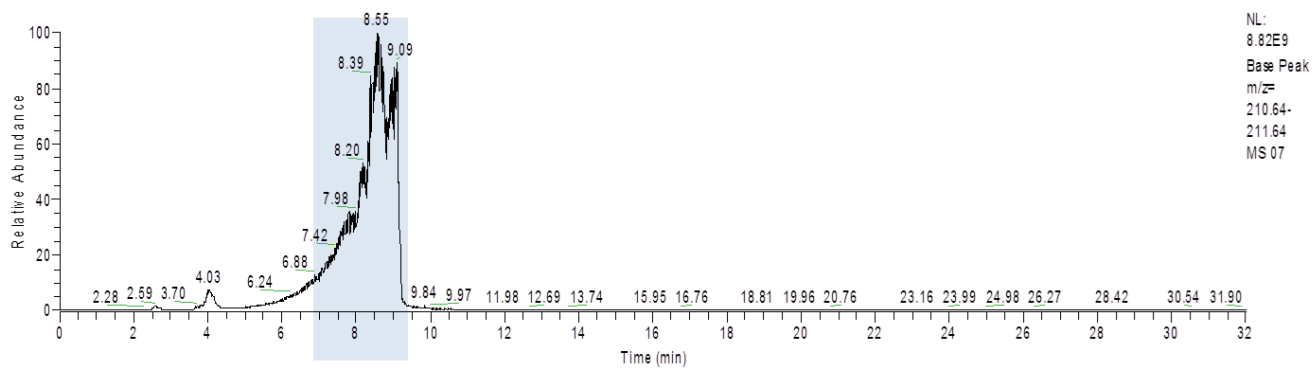

07#1927 RT: 8.44 AV: 1 NL: 6.31E9  
 T: FTMS + p APCI corona Full ms[150.0000-2000.0000]

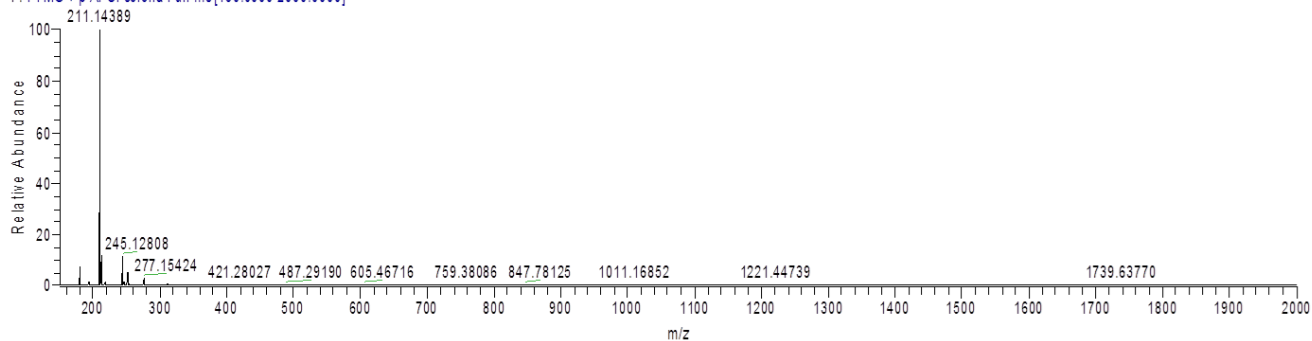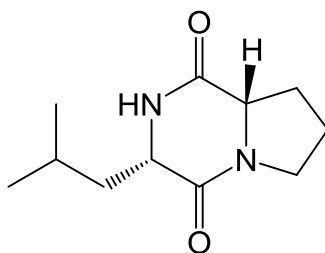

### Gancidin W

Chemical Formula: C<sub>11</sub>H<sub>18</sub>N<sub>2</sub>O<sub>2</sub>

Exact Mass: 210.14

Gancidin W



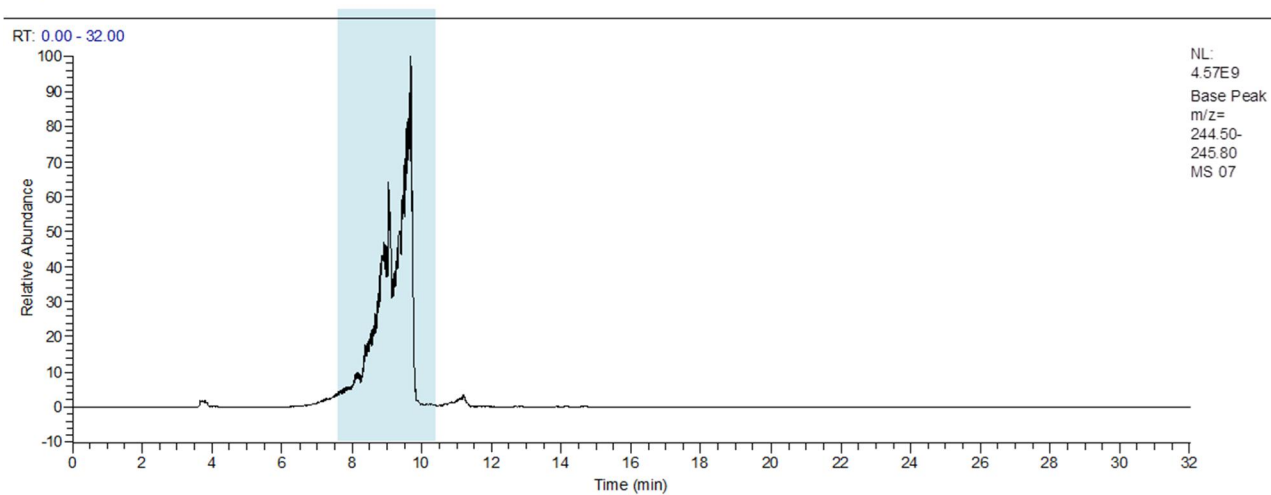

07 #2108 RT: 9.24 AV: 1 NL: 1.59E9  
T: FTMS + p APCI corona Full ms [150.0000-2000.0000]

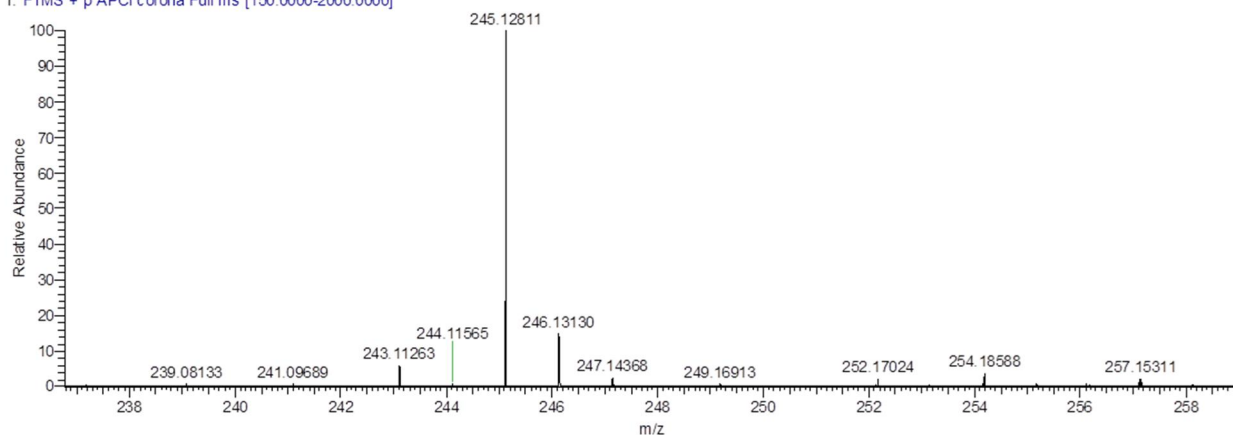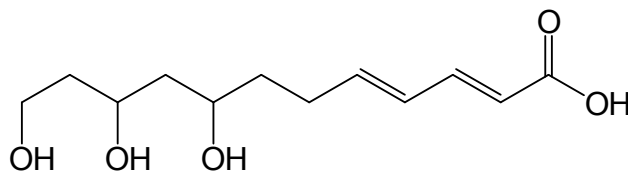

**YF-0200-R-B**

Exact Mass: 244.13  
Molecular Weight: 244.29

**YF-0200-R-B**

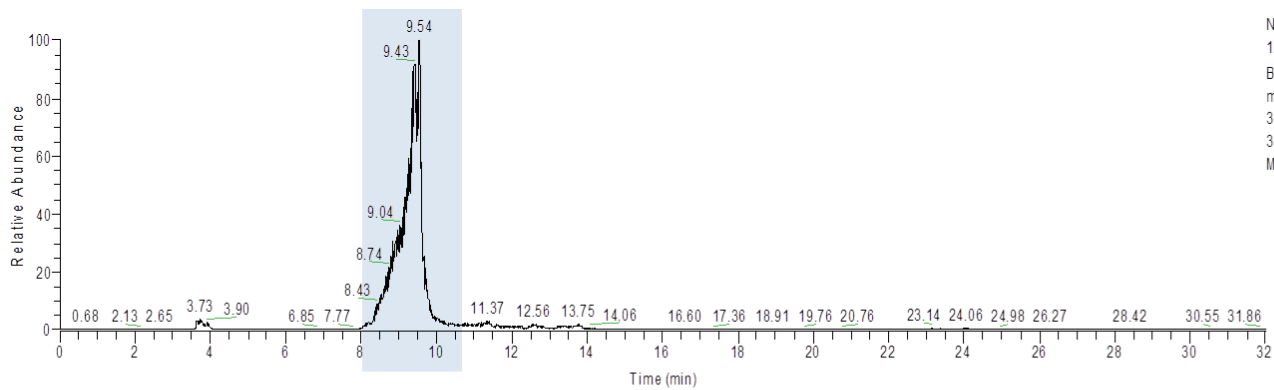

NL:  
1.08E9  
Base Peak  
m/z=  
310.63-  
311.63  
MS 07

07 #2131 RT: 9.34 AV: 1 NL: 8.02E8  
T: FTMS + p APCI corona Full ms [150.0000-2000.0000]

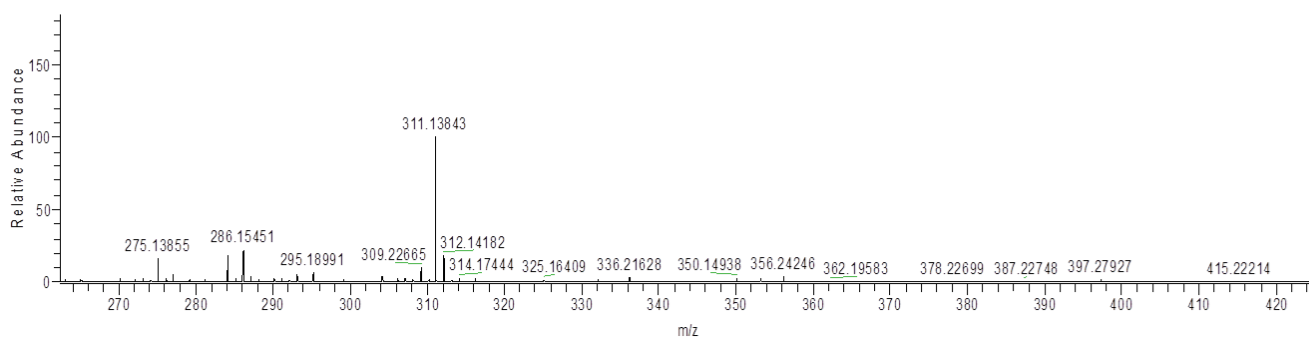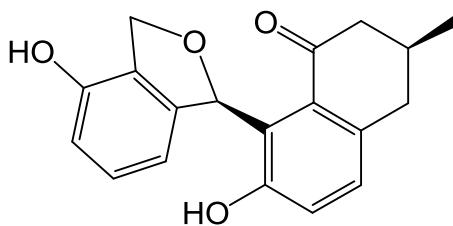

## Emycin-E

Chemical Formula:  $C_{19}H_{18}O_4$

Exact Mass: 310.12

Emycin E

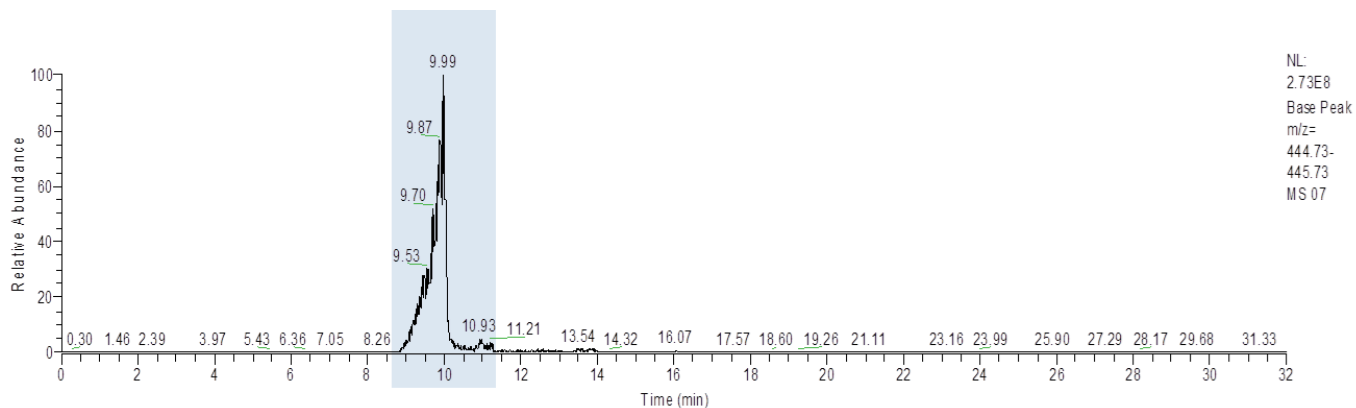

07 #2275 RT: 9.97 AV: 1 NL: 1.79E8  
 T: FTMS + p APCI corona Full ms [150.0000-2000.0000]

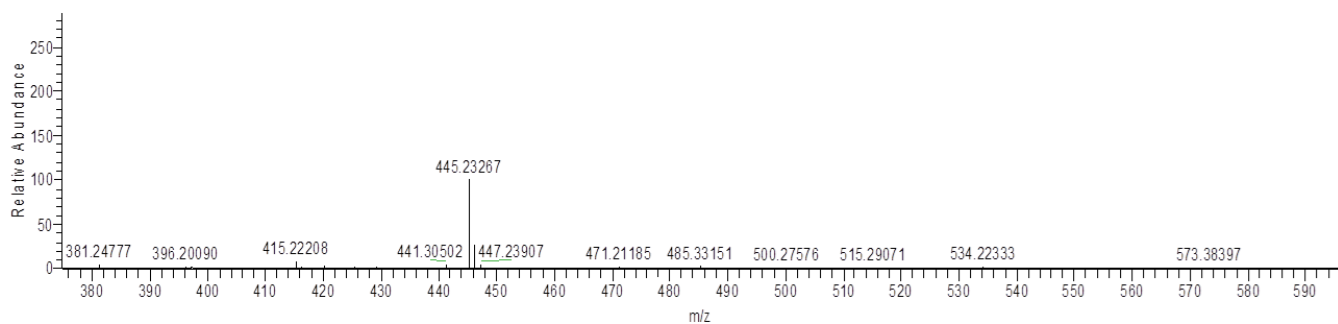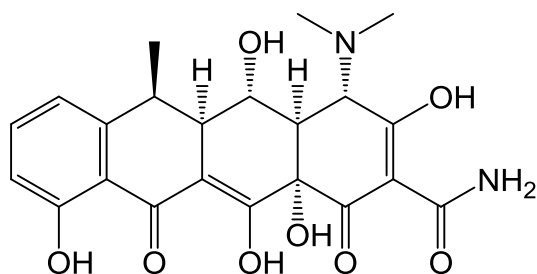

### 6-beta-deoxy-5-hydroxy-tetracycline

Chemical Formula:  $C_{22}H_{24}N_2O_8$

Exact Mass: 444.15

6-beta-deoxy-5-hydroxy-tetracycline

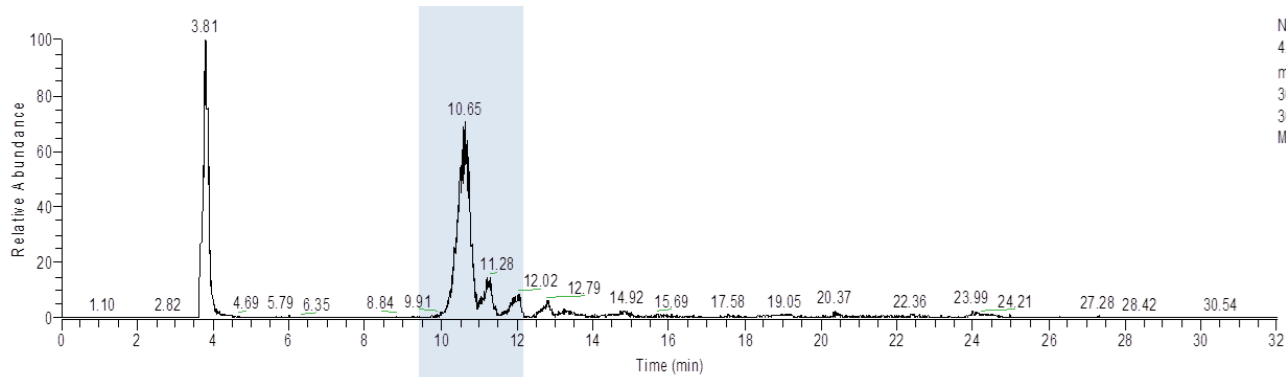

NL:  
4.59E8  
m/z=  
365.96-  
368.19  
MS 07

07 #2416 RT: 10.58 AV: 1 NL: 2.73E8  
T: FTMS + p APCI corona Full ms [150.0000-2000.0000]

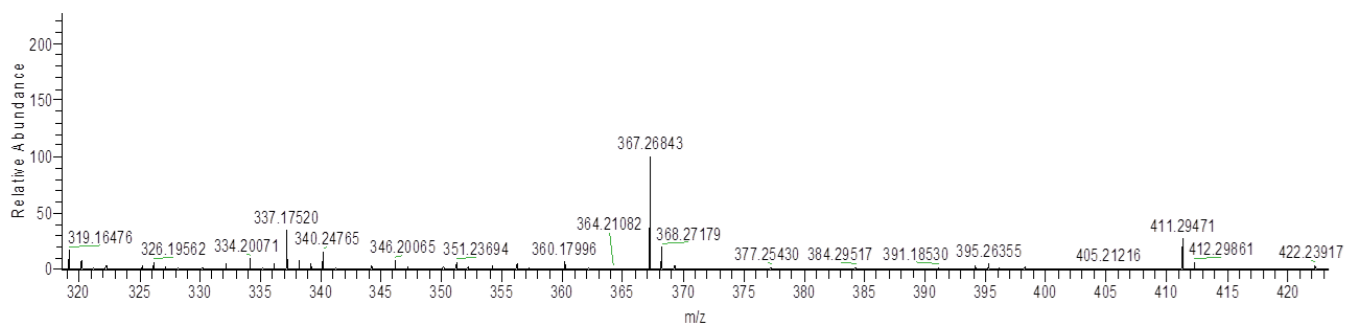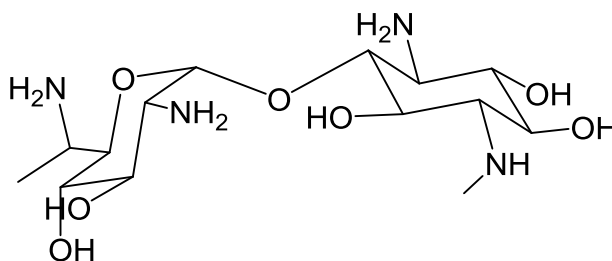

## Fortimicin-KK1

Chemical Formula:  $C_{14}H_{30}N_4O_7$

Exact Mass: 366.21

Fortimicin KK1

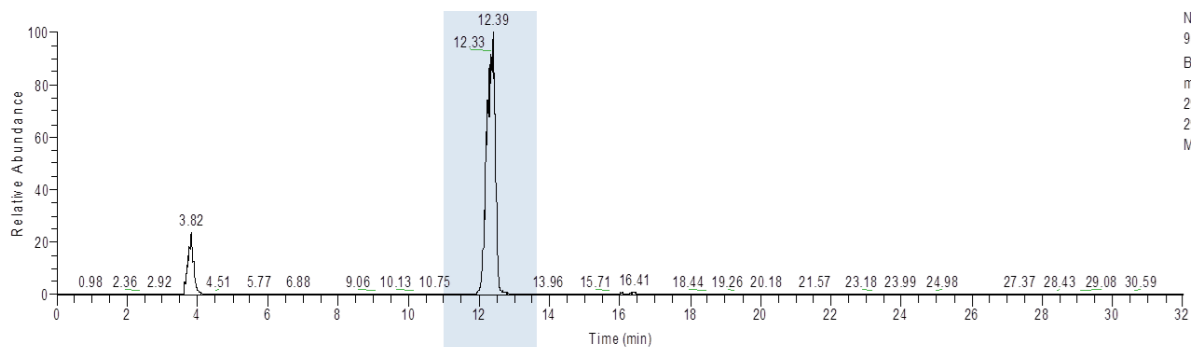

NL:  
9.90E9  
Base Peak  
m/z=  
293.63-  
294.63  
MS 07

07 #2805 RT: 12.29 AV: 1 NL: 8.07E9  
T: FTMS + p APCI corona Full ms[150.0000-2000.0000]

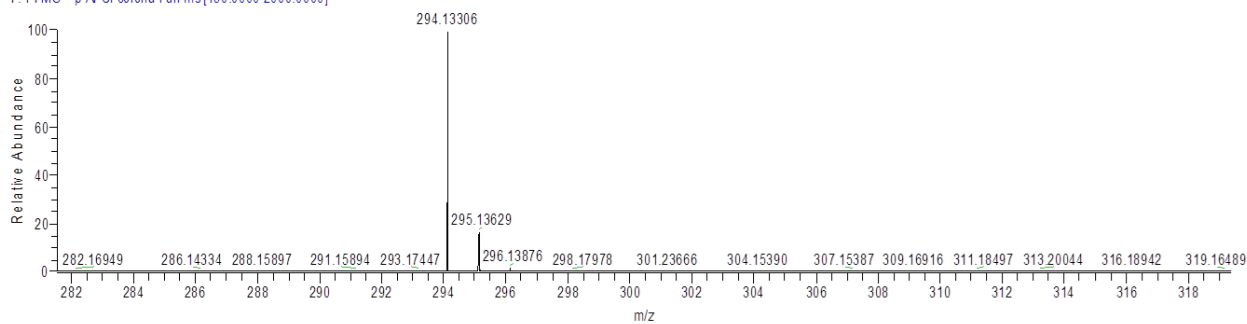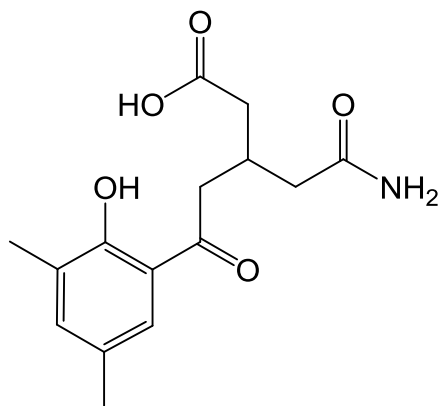

## Phenetic acid

Chemical Formula:  $C_{15}H_{19}NO_5$

Exact Mass: 293.13

Phenetic acid

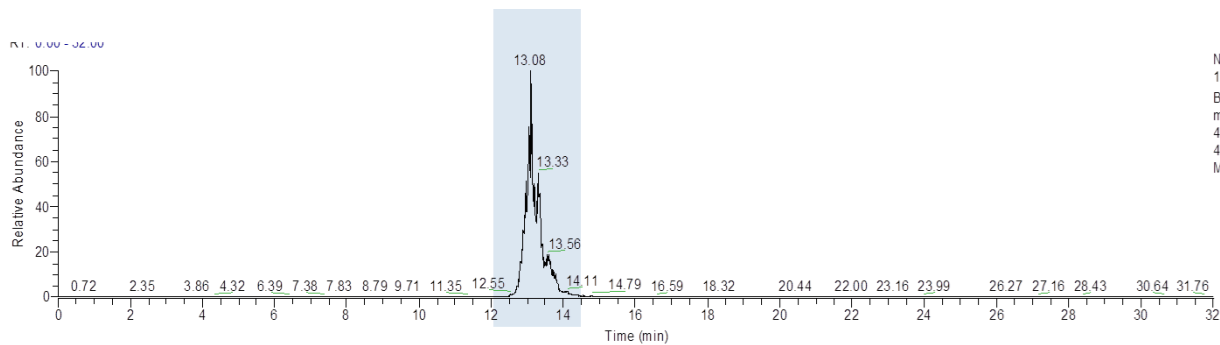

07 #2998 RT: 13.13 AV: 1 NL: 9.14E8  
 T: FTMS + p APCI corona Full ms [150.0000-2000.0000]

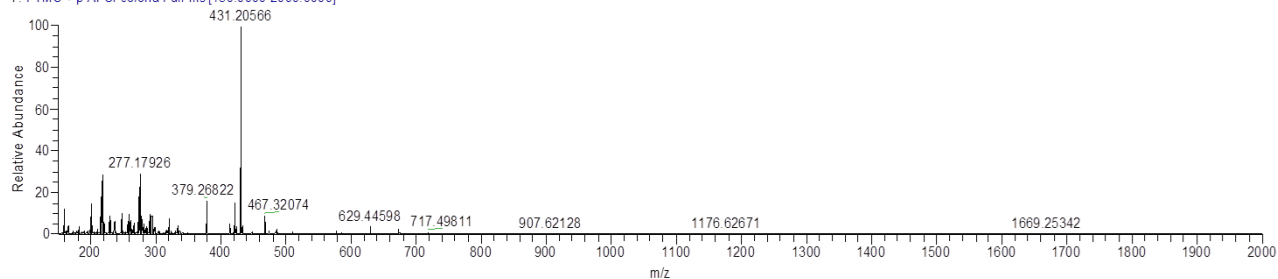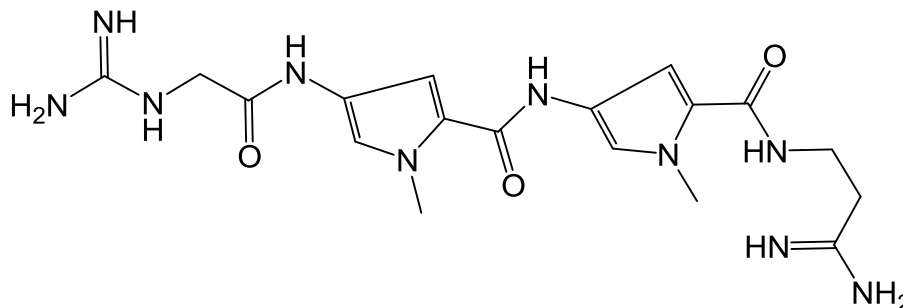

## Netropsin

Chemical Formula:  $C_{18}H_{26}N_{10}O_3$

Exact Mass: 430.22

## Netropsin

RT: 0.00 - 32.00

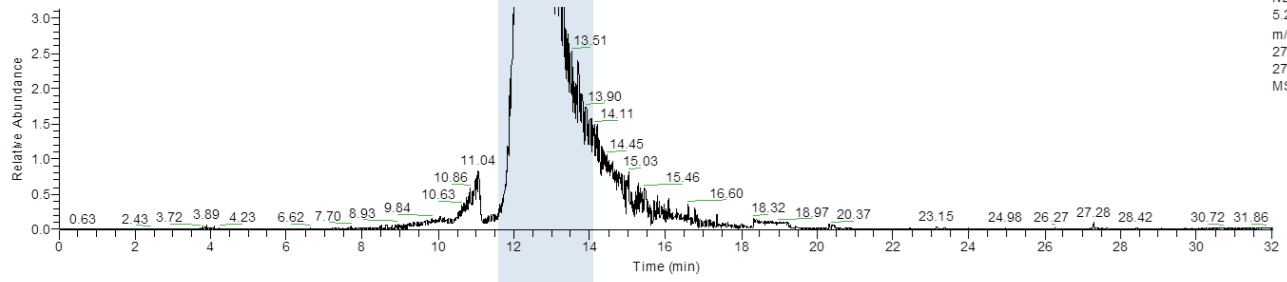

NL:  
5.23E9  
m/z=  
276.12-  
276.13  
MS 07

07 #3496 RT: 15.31 AV: 1 NL: 2.56E7  
T: FTMS + p APCI corona Full ms [150.0000-2000.0000]

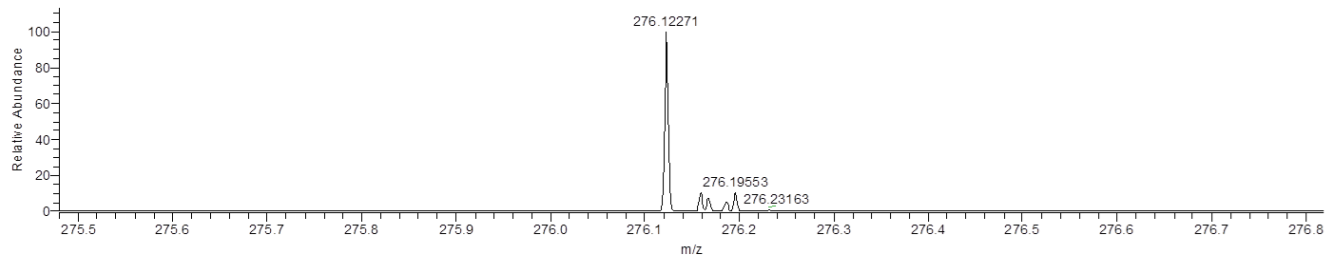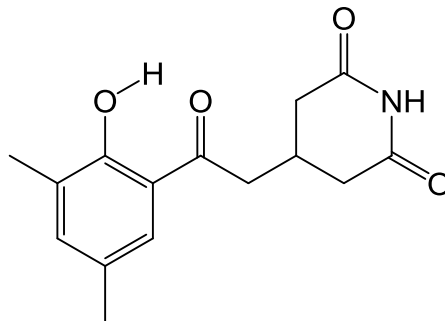

## Actiphenol

Chemical Formula:  $C_{15}H_{17}NO_4$

Exact Mass: 275.12

Actiphenol

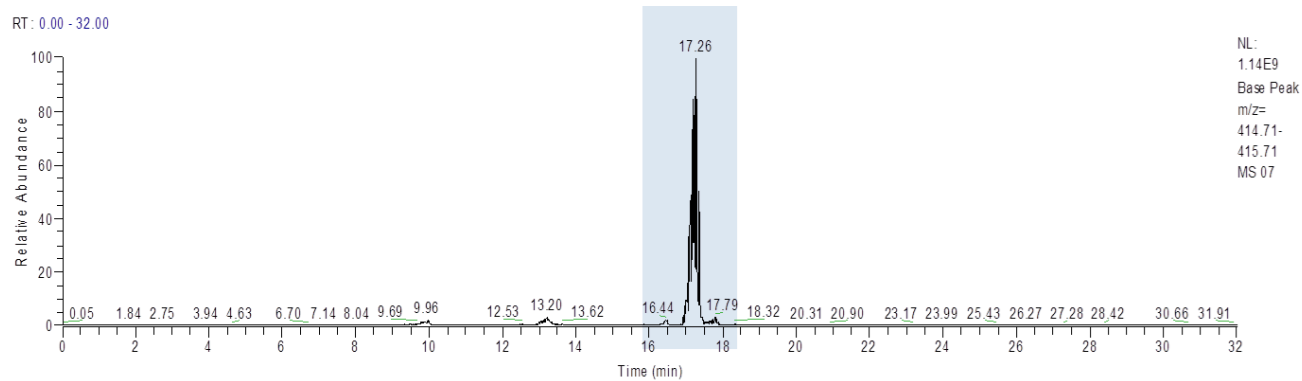

07 #3917 RT: 17.16 AV: 1 NL: 5.80E8  
T: FTMS + p APCI corona Full ms[150.0000-2000.0000]

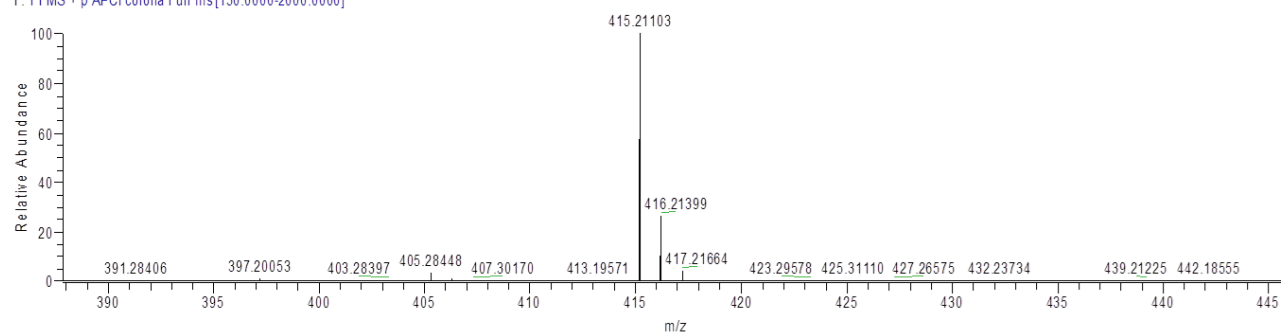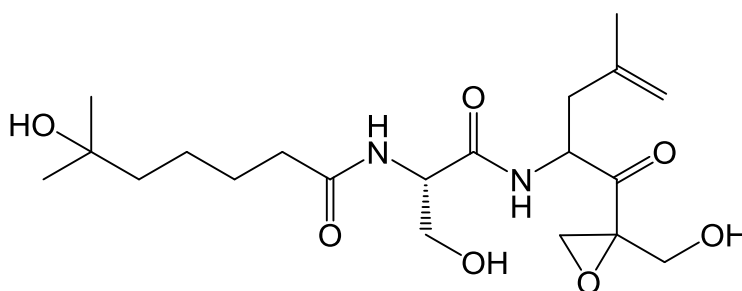

## TMC-86B

Chemical Formula:  $C_{20}H_{34}N_2O_7$

Exact Mass: 414.24

TMC-86B





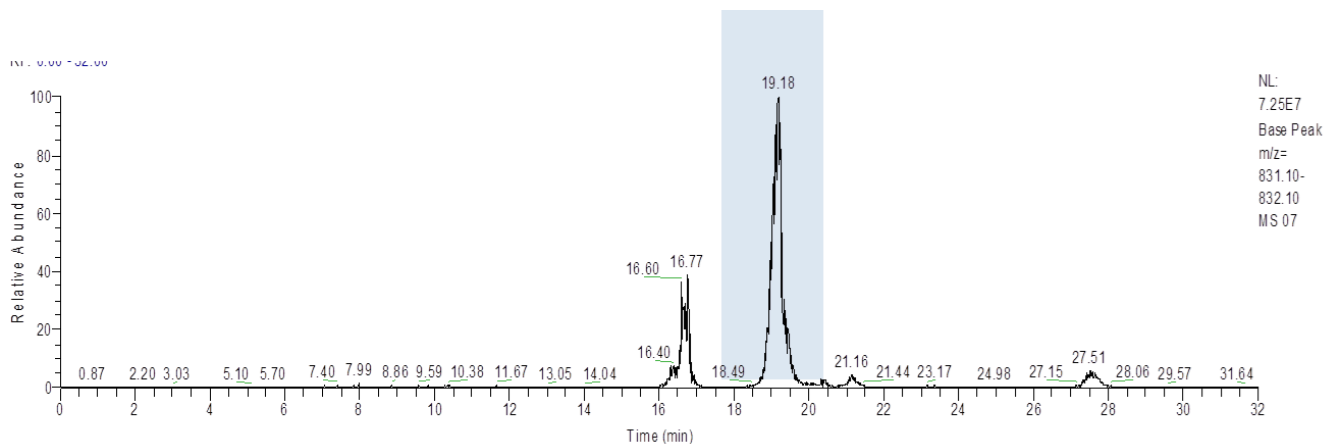

07 #4358 RT: 19.09 AV: 1 NL: 4.18E7  
 T: FTMS + p APCI corona Full ms [150.0000-2000.0000]

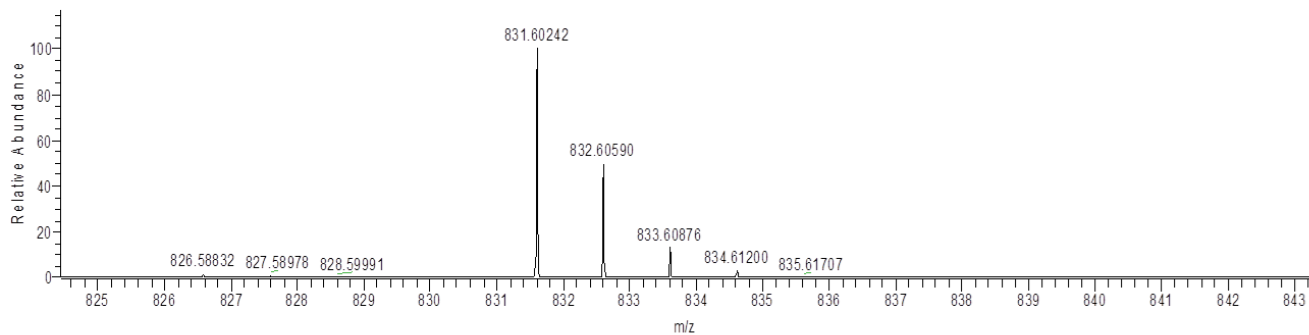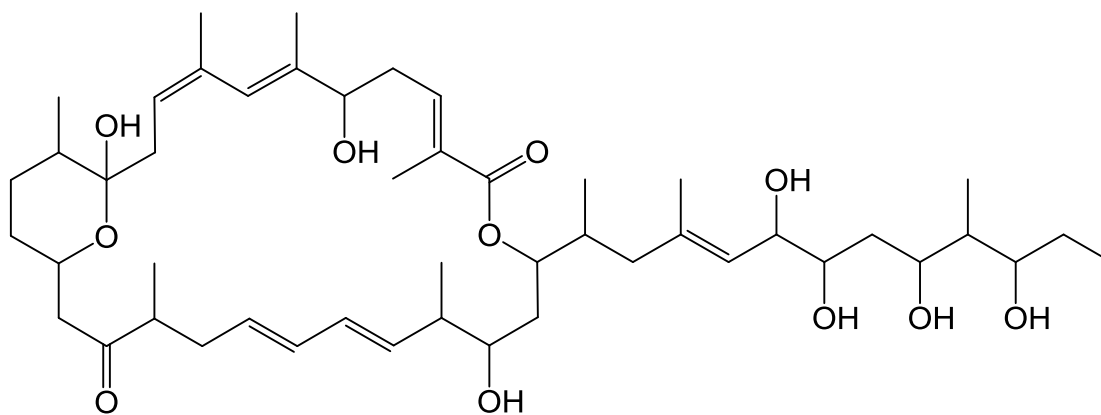

## Halstoctacosanolide B

Chemical Formula:  $C_{48}H_{78}O_{11}$

Exact Mass: 830.55

## Halstoctacosanolide B

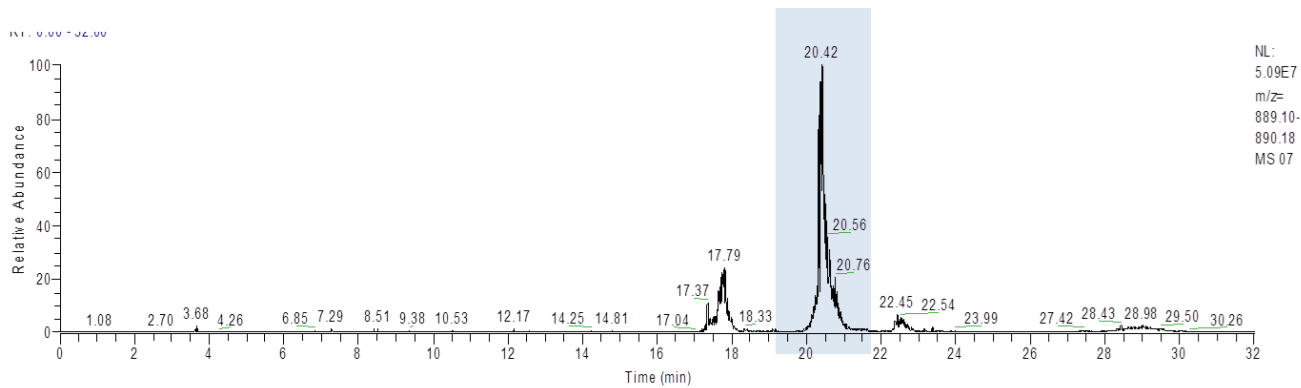

07 #4632 RT: 20.29 AV: 1 NL: 6.69E6  
 T: FTMS + p APCI corona Full ms[150.0000-2000.0000]

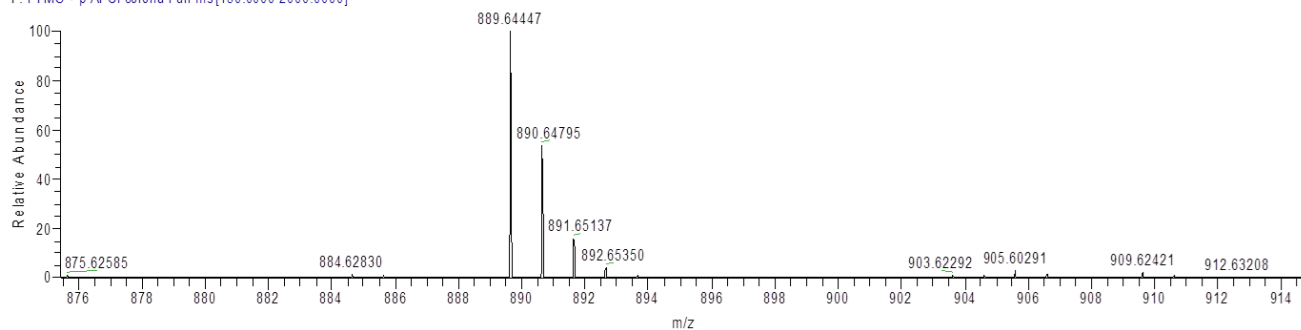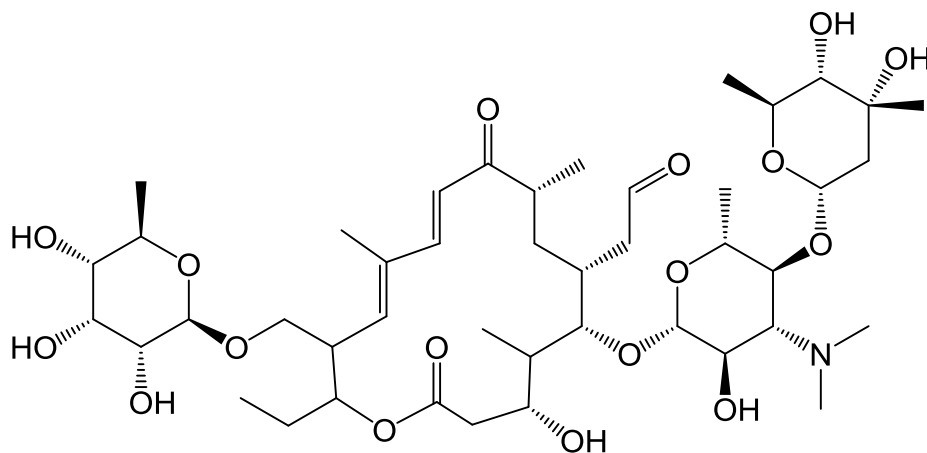

### YO - 7625

Chemical Formula:  $C_{44}H_{73}NO_{17}$

Exact Mass: 887.49

YO-7625

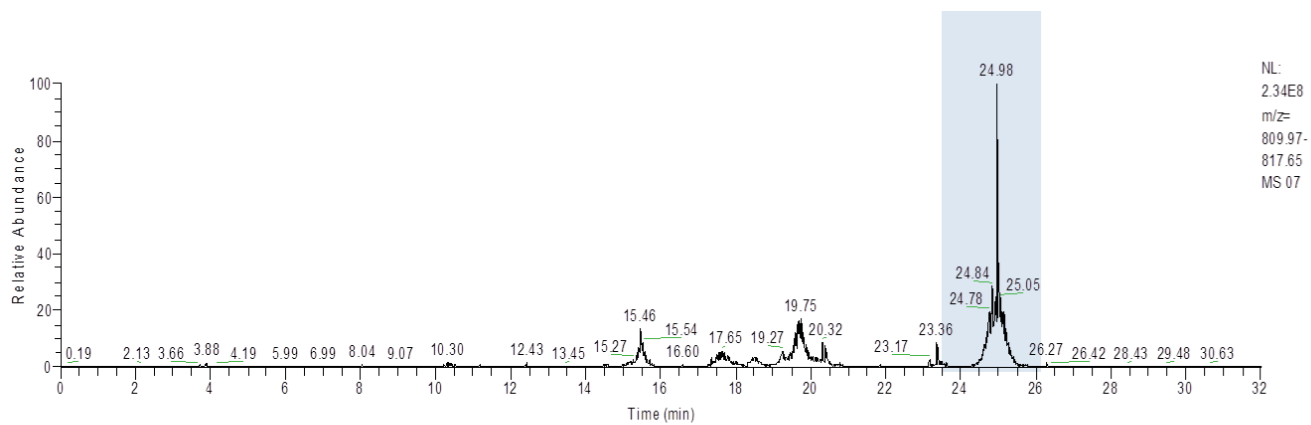

07 #5742 RT: 25.16 AV: 1 NL: 1.20E7  
 T: FTMS + p APCI corona Full ms [150.0000-2000.0000]

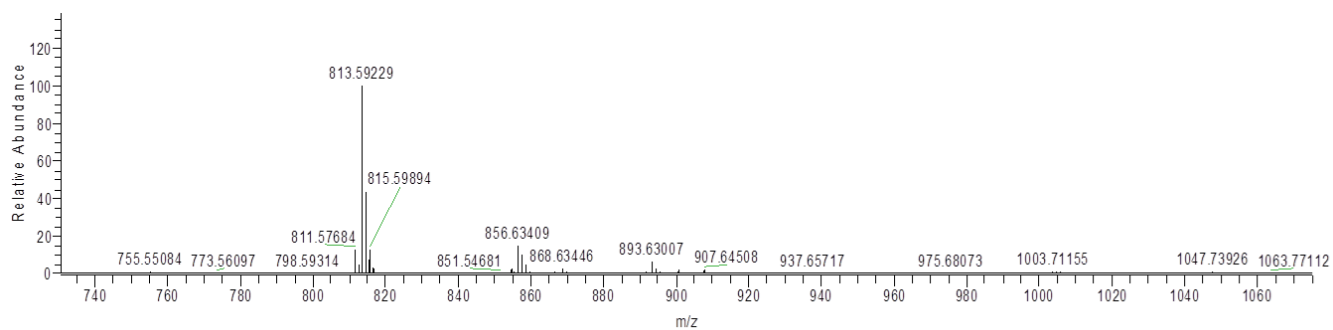

Unknown

# *Streptomyces griseus* 16S rRNA comparison

**3\_1525:** *Streptomyces* sp. SN25\_8.1 from Easter Island marine sediment.

**4\_1525:** *Streptomyces griseus* subsp. *griseus* DSM 40236<sup>T</sup> from a Russian garden soil.

### BLAST Results

[Questions/comments](#)

**Job title:** 3\_1525

**RID** [TYT6T7XZ01R](#) (Expires on 09-18 16:24 pm)

**Query ID** lcl|Query\_122625  
**Description** 3\_1525  
**Molecule type** nucleic acid  
**Query Length** 1477

**Database Name** nr  
**Description** Nucleotide collection (nt)  
**Program** BLASTN 2.8.0+

### Graphic Summary

**Distribution of the top 190 Blast Hits on 100 subject sequences**

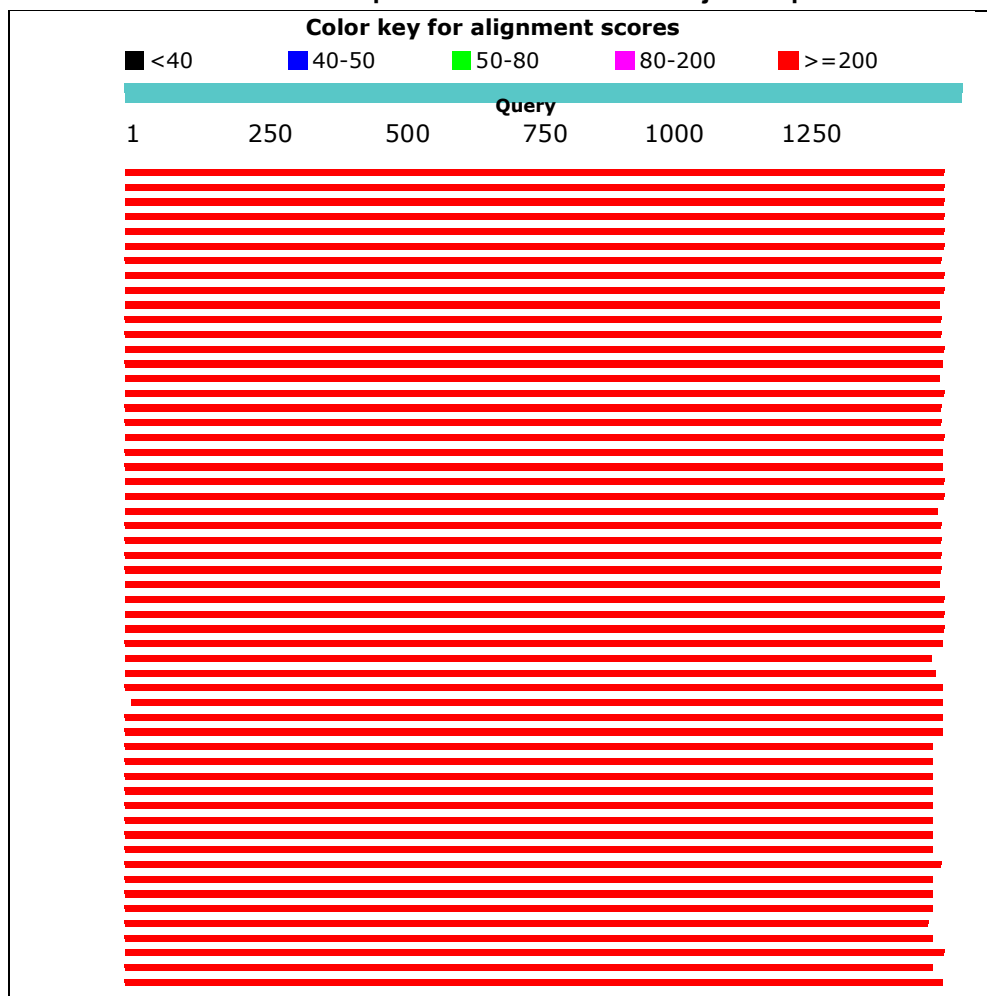

## Descriptions

Sequences producing significant alignments:

| Description                                                                                           | Max score | Total score | Query cover | E value | Ident | Accession                   |
|-------------------------------------------------------------------------------------------------------|-----------|-------------|-------------|---------|-------|-----------------------------|
| <i>Streptomyces griseus</i> subsp. <i>griseus</i> NBRC 13350 DNA, complete genome                     | 2721      | 16327       | 99%         | 0.0     | 99%   | <a href="#">AP009493.1</a>  |
| <i>Streptomyces pratensis</i> ATCC 33331, complete genome                                             | 2715      | 16238       | 99%         | 0.0     | 99%   | <a href="#">CP002475.1</a>  |
| <i>Streptomyces globisporus</i> strain TFH56 chromosome, complete genome                              | 2710      | 16238       | 99%         | 0.0     | 99%   | <a href="#">CP029361.1</a>  |
| <i>Streptomyces fulvissimus</i> strain DSM 40593 16S ribosomal RNA, partial sequence                  | 2710      | 2710        | 99%         | 0.0     | 99%   | <a href="#">NR_103947.1</a> |
| <i>Streptomyces fulvissimus</i> DSM 40593, complete genome                                            | 2710      | 16260       | 99%         | 0.0     | 99%   | <a href="#">CP005080.1</a>  |
| <i>Streptomyces</i> sp. PAMC26508, complete genome                                                    | 2710      | 16257       | 99%         | 0.0     | 99%   | <a href="#">CP003990.1</a>  |
| <i>Streptomyces pratensis</i> strain ch24 16S ribosomal RNA, partial sequence                         | 2706      | 2706        | 99%         | 0.0     | 99%   | <a href="#">NR_125621.1</a> |
| <i>Streptomyces globisporus</i> C-1027, complete genome                                               | 2704      | 16227       | 99%         | 0.0     | 99%   | <a href="#">CP013738.1</a>  |
| <i>Streptomyces luridiscabiei</i> strain S63 16S ribosomal RNA, partial sequence                      | 2704      | 2704        | 99%         | 0.0     | 99%   | <a href="#">NR_025155.1</a> |
| <i>Streptomyces flavolimosus</i> strain CGMCC 2027 16S ribosomal RNA gene, partial sequence           | 2702      | 2702        | 99%         | 0.0     | 99%   | <a href="#">EF688620.1</a>  |
| <i>Streptomyces praecox</i> strain CGMCC 4.1782 clone 3 16S ribosomal RNA gene, complete sequence     | 2700      | 2700        | 99%         | 0.0     | 99%   | <a href="#">JQ924404.1</a>  |
| <i>Streptomyces pratensis</i> strain ch24 16S ribosomal RNA, partial sequence                         | 2700      | 2700        | 99%         | 0.0     | 99%   | <a href="#">NR_125619.1</a> |
| <i>Streptomyces</i> sp. SM18 chromosome, complete genome                                              | 2699      | 16183       | 99%         | 0.0     | 99%   | <a href="#">CP029342.1</a>  |
| <i>Streptomyces flavofuscus</i> strain CGMCC 4.1938 clone 3 16S ribosomal RNA gene, complete sequence | 2699      | 2699        | 99%         | 0.0     | 99%   | <a href="#">JQ924409.1</a>  |
| <i>Streptomyces griseus</i> strain NRRL B-8030 16S ribosomal RNA gene, partial sequence               | 2699      | 2699        | 99%         | 0.0     | 99%   | <a href="#">DQ026671.1</a>  |
| <i>Streptomyces</i> sp. Tue6075, complete genome                                                      | 2695      | 16157       | 99%         | 0.0     | 99%   | <a href="#">CP010833.1</a>  |
| <i>Streptomyces praecox</i> strain CGMCC 4.1782 clone 2 16S ribosomal RNA gene, complete sequence     | 2695      | 2695        | 99%         | 0.0     | 99%   | <a href="#">JQ924403.1</a>  |
| <i>Streptomyces pratensis</i> strain ch24 16S ribosomal RNA, partial sequence                         | 2695      | 2695        | 99%         | 0.0     | 99%   | <a href="#">NR_125618.1</a> |
| <i>Streptomyces violaceoruber</i> strain S21, complete genome                                         | 2693      | 16161       | 99%         | 0.0     | 99%   | <a href="#">CP020570.1</a>  |
| <i>Streptomyces flavofuscus</i> strain CGMCC 4.1938 clone 2 16S ribosomal RNA gene, complete sequence | 2693      | 2693        | 99%         | 0.0     | 99%   | <a href="#">JQ924408.1</a>  |
| <i>Streptomyces flavofuscus</i> strain CGMCC 4.1938 clone 1 16S ribosomal RNA gene, complete sequence | 2693      | 2693        | 99%         | 0.0     | 99%   | <a href="#">JQ924407.1</a>  |
| <i>Streptomyces</i> sp. SirexAA-E, complete genome                                                    | 2693      | 16133       | 99%         | 0.0     | 99%   | <a href="#">CP002993.1</a>  |
| <i>Streptomyces flavofuscus</i> strain NRRL B-2594 16S ribosomal RNA gene, partial sequence           | 2693      | 2693        | 100%        | 0.0     | 99%   | <a href="#">EF178690.1</a>  |

| Description                                                                                             | Max score | Total score | Query cover | E value | Ident | Accession                   |
|---------------------------------------------------------------------------------------------------------|-----------|-------------|-------------|---------|-------|-----------------------------|
| Streptomyces microflavus strain NRRL B-2156 16S ribosomal RNA gene, partial sequence                    | 2691      | 2691        | 99%         | 0.0     | 99%   | <a href="#">DQ445795.1</a>  |
| Streptomyces praecox strain CGMCC 4.1782 clone 5 16S ribosomal RNA gene, complete sequence              | 2689      | 2689        | 99%         | 0.0     | 99%   | <a href="#">JQ924406.1</a>  |
| Streptomyces praecox strain CGMCC 4.1782 clone 4 16S ribosomal RNA gene, complete sequence              | 2689      | 2689        | 99%         | 0.0     | 99%   | <a href="#">JQ924405.1</a>  |
| Streptomyces praecox strain CGMCC 4.1782 clone 1 16S ribosomal RNA gene, complete sequence              | 2689      | 2689        | 99%         | 0.0     | 99%   | <a href="#">JQ924402.1</a>  |
| Streptomyces pratensis strain ch24 16S ribosomal RNA, partial sequence                                  | 2689      | 2689        | 99%         | 0.0     | 99%   | <a href="#">NR_125620.1</a> |
| Streptomyces anulatus strain NRRL B-2000 16S ribosomal RNA gene, partial sequence                       | 2689      | 2689        | 99%         | 0.0     | 99%   | <a href="#">DQ026637.1</a>  |
| Streptomyces baarnensis strain NRRL B-1902 16S ribosomal RNA gene, partial sequence                     | 2687      | 2687        | 100%        | 0.0     | 99%   | <a href="#">EF178688.1</a>  |
| Streptomyces flavogriseus partial 16S rRNA gene, type strain CBS 101.34T                                | 2687      | 2687        | 99%         | 0.0     | 99%   | <a href="#">AJ494864.1</a>  |
| Streptomyces sp. CFMR 7 strain CFMR-7, complete genome                                                  | 2682      | 15924       | 99%         | 0.0     | 99%   | <a href="#">CP011522.1</a>  |
| Streptomyces flavovirens strain CGMCC 4.575 clone 1 16S ribosomal RNA gene, complete sequence           | 2682      | 2682        | 99%         | 0.0     | 99%   | <a href="#">JQ924386.1</a>  |
| Streptomyces griseus subsp. griseus gene for 16S rRNA, partial sequence, strain: NBRC 15744             | 2680      | 2680        | 98%         | 0.0     | 99%   | <a href="#">AB184699.1</a>  |
| Streptomyces argenteolus strain JCM 4623 16S ribosomal RNA, partial sequence                            | 2680      | 2680        | 99%         | 0.0     | 99%   | <a href="#">NR_112120.1</a> |
| Streptomyces flavovirens strain CGMCC 4.575 clone 2 16S ribosomal RNA gene, complete sequence           | 2678      | 2678        | 99%         | 0.0     | 99%   | <a href="#">JQ924387.1</a>  |
| Streptomyces sp. YM5-799 gene for 16S rRNA, partial sequence                                            | 2678      | 2678        | 98%         | 0.0     | 99%   | <a href="#">AB534176.1</a>  |
| Streptomyces flavovirens strain CGMCC 4.575 clone 5 16S ribosomal RNA gene, complete sequence           | 2676      | 2676        | 99%         | 0.0     | 99%   | <a href="#">JQ924389.1</a>  |
| Streptomyces flavovirens strain CGMCC 4.575 clone 4 16S ribosomal RNA gene, complete sequence           | 2676      | 2676        | 99%         | 0.0     | 99%   | <a href="#">JQ924388.1</a>  |
| Streptomyces microflavus strain NRRL B-1332 16S ribosomal RNA gene, partial sequence                    | 2675      | 2675        | 98%         | 0.0     | 99%   | <a href="#">EF178673.1</a>  |
| Streptomyces paresii 16S rRNA gene, type strain LMG 23704T                                              | 2675      | 2675        | 98%         | 0.0     | 99%   | <a href="#">AJ969177.1</a>  |
| Streptomyces anulatus gene for 16S rRNA, partial sequence, strain: NBRC 13369                           | 2673      | 2673        | 98%         | 0.0     | 99%   | <a href="#">AB184875.1</a>  |
| Streptomyces cavourensis subsp. washingtonensis gene for 16S rRNA, partial sequence, strain: NBRC 15391 | 2673      | 2673        | 98%         | 0.0     | 99%   | <a href="#">AB184642.1</a>  |
| Streptomyces acidoresistans gene for 16S rRNA, partial sequence, strain: NBRC 13442                     | 2673      | 2673        | 98%         | 0.0     | 99%   | <a href="#">AB184406.1</a>  |
| Streptomyces praecox gene for 16S rRNA, partial sequence, strain: NBRC 13073                            | 2673      | 2673        | 98%         | 0.0     | 99%   | <a href="#">AB184293.1</a>  |
| Streptomyces albobiridis gene for 16S rRNA, partial sequence, strain: NBRC 13013                        | 2673      | 2673        | 98%         | 0.0     | 99%   | <a href="#">AB184256.1</a>  |



| Description                                                                                             | Max score | Total score | Query cover | E value | Ident | Accession                  |
|---------------------------------------------------------------------------------------------------------|-----------|-------------|-------------|---------|-------|----------------------------|
| Streptomyces argenteolus gene for 16S rRNA, partial sequence, strain: NBRC 12841                        | 2673      | 2673        | 98%         | 0.0     | 99%   | <a href="#">AB184187.1</a> |
| Streptomyces finlayi strain CGMCC 4.1436 clone 1 16S ribosomal RNA gene, complete sequence              | 2669      | 2669        | 99%         | 0.0     | 99%   | <a href="#">JQ924390.1</a> |
| Streptomyces rubiginosohelvolus gene for 16S rRNA, partial sequence, strain: NBRC 12912                 | 2669      | 2669        | 98%         | 0.0     | 99%   | <a href="#">AB184240.2</a> |
| Streptomyces microflavus gene for 16S rRNA, partial sequence, strain: NBRC 13062                        | 2669      | 2669        | 98%         | 0.0     | 99%   | <a href="#">AB184284.1</a> |
| Streptomyces fulvoroebus gene for 16S rRNA, partial sequence, strain: NBRC 15897                        | 2667      | 2667        | 98%         | 0.0     | 99%   | <a href="#">AB184711.1</a> |
| Streptomyces griseus subsp. griseus gene for 16S rRNA, partial sequence, strain: NBRC 12875             | 2667      | 2667        | 97%         | 0.0     | 99%   | <a href="#">AB184211.1</a> |
| Streptomyces griseinus gene for 16S rRNA, partial sequence, strain: NBRC 12869                          | 2667      | 2667        | 98%         | 0.0     | 99%   | <a href="#">AB184205.1</a> |
| Streptomyces sp. S8, complete genome                                                                    | 2665      | 15950       | 99%         | 0.0     | 99%   | <a href="#">CP015362.1</a> |
| Streptomyces flavofuscus gene for 16S rRNA, partial sequence, strain: NBRC 100768                       | 2665      | 2665        | 98%         | 0.0     | 99%   | <a href="#">AB249935.1</a> |
| Streptomyces clavifer strain NRRL B-2557 16S ribosomal RNA gene, partial sequence                       | 2663      | 2663        | 99%         | 0.0     | 99%   | <a href="#">DQ026670.1</a> |
| Streptomyces albovinaceus gene for 16S rRNA, partial sequence, strain: NBRC 12739                       | 2663      | 2663        | 98%         | 0.0     | 99%   | <a href="#">AB249958.1</a> |
| Streptomyces erumpens gene for 16S rRNA, partial sequence, strain: NBRC 15403                           | 2663      | 2663        | 97%         | 0.0     | 99%   | <a href="#">AB184654.1</a> |
| Streptomyces baarnensis gene for 16S rRNA, partial sequence, strain: NBRC 14727                         | 2663      | 2663        | 98%         | 0.0     | 99%   | <a href="#">AB184615.1</a> |
| Streptomyces fimicarius gene for 16S rRNA, partial sequence, strain: NBRC 13037                         | 2663      | 2663        | 98%         | 0.0     | 99%   | <a href="#">AB184269.1</a> |
| Streptomyces globisporus subsp. globisporus gene for 16S rRNA, partial sequence, strain: NBRC 12867     | 2663      | 2663        | 98%         | 0.0     | 99%   | <a href="#">AB184203.1</a> |
| Streptomyces cavourensis strain TJ430 chromosome, complete genome                                       | 2662      | 15856       | 99%         | 0.0     | 99%   | <a href="#">CP030930.1</a> |
| Streptomyces bacillaris strain ATCC 15855 chromosome, complete genome                                   | 2662      | 15972       | 99%         | 0.0     | 99%   | <a href="#">CP029378.1</a> |
| Streptomyces cavourensis strain 1AS2a chromosome, complete genome                                       | 2662      | 15928       | 99%         | 0.0     | 99%   | <a href="#">CP024957.1</a> |
| Streptomyces globisporus subsp. globisporus strain NRRL B-2872 16S ribosomal RNA gene, partial sequence | 2662      | 2662        | 98%         | 0.0     | 99%   | <a href="#">EF178686.1</a> |
| Streptomyces griseolus gene for 16S rRNA, partial sequence, strain: NBRC 3415                           | 2662      | 2662        | 98%         | 0.0     | 99%   | <a href="#">AB184768.1</a> |
| Streptomyces puniceus gene for 16S rRNA, partial sequence, strain: NBRC 12811                           | 2662      | 2662        | 98%         | 0.0     | 99%   | <a href="#">AB184163.1</a> |
| Streptomyces halstedii gene for 16S rRNA, partial sequence, strain: NBRC 12783                          | 2662      | 2662        | 98%         | 0.0     | 99%   | <a href="#">AB184142.1</a> |

| Description                                                                                     | Max score | Total score | Query cover | E value | Ident | Accession                  |
|-------------------------------------------------------------------------------------------------|-----------|-------------|-------------|---------|-------|----------------------------|
| Streptomyces atratus strain SCSIO_ZH16 chromosome, complete genome                              | 2660      | 15961       | 99%         | 0.0     | 99%   | <a href="#">CP027306.1</a> |
| Streptomyces flavovirens strain NRRL B-2685 16S ribosomal RNA gene, partial sequence            | 2660      | 2660        | 99%         | 0.0     | 99%   | <a href="#">DQ026635.1</a> |
| Streptomyces pluricolorscens gene for 16S rRNA, partial sequence, strain: NBRC 12808            | 2660      | 2660        | 98%         | 0.0     | 99%   | <a href="#">AB184162.1</a> |
| Streptomyces olivoviridis strain CGMCC 4.1739 clone 2 16S ribosomal RNA gene, complete sequence | 2658      | 2658        | 99%         | 0.0     | 99%   | <a href="#">JQ924394.1</a> |
| Streptomyces finlayi strain CGMCC 4.1436 clone 2 16S ribosomal RNA gene, complete sequence      | 2658      | 2658        | 99%         | 0.0     | 99%   | <a href="#">JQ924391.1</a> |
| Streptomyces californicus gene for 16S rRNA, partial sequence, strain: NBRC 12750               | 2658      | 2658        | 98%         | 0.0     | 99%   | <a href="#">AB184116.2</a> |
| Streptomyces cinereorectus gene for 16S rRNA, partial sequence, strain: NBRC 15395              | 2658      | 2658        | 98%         | 0.0     | 99%   | <a href="#">AB184646.1</a> |
| Streptomyces mutomycini strain CGMCC 4.1747 clone 3 16S ribosomal RNA gene, complete sequence   | 2656      | 2656        | 99%         | 0.0     | 99%   | <a href="#">JQ924399.1</a> |
| Streptomyces halstedii strain NRRL B-1238 16S ribosomal RNA gene, partial sequence              | 2656      | 2656        | 98%         | 0.0     | 99%   | <a href="#">EF178695.1</a> |
| Streptomyces parvus gene for 16S rRNA, partial sequence, strain: NBRC 3388                      | 2656      | 2656        | 98%         | 0.0     | 99%   | <a href="#">AB184756.1</a> |
| Streptomyces californicus gene for 16S rRNA, partial sequence, strain: NBRC 3386                | 2656      | 2656        | 98%         | 0.0     | 99%   | <a href="#">AB184755.1</a> |
| Streptomyces badius gene for 16S rRNA, partial sequence, strain: NBRC 12745                     | 2656      | 2656        | 98%         | 0.0     | 99%   | <a href="#">AB184114.1</a> |
| Streptomyces lunaelactis strain MM109 chromosome, complete genome                               | 2654      | 15660       | 99%         | 0.0     | 99%   | <a href="#">CP026304.1</a> |
| Streptomyces nitrosporeus strain CGMCC 4.1973 clone 4 16S ribosomal RNA gene, complete sequence | 2654      | 2654        | 99%         | 0.0     | 99%   | <a href="#">JQ924413.1</a> |
| Streptomyces anulatus strain NRRL B-2873 16S ribosomal RNA gene, partial sequence               | 2654      | 2654        | 97%         | 0.0     | 99%   | <a href="#">DQ026639.1</a> |
| Streptomyces sindenensis gene for 16S rRNA, partial sequence, strain: NBRC 3399                 | 2654      | 2654        | 98%         | 0.0     | 99%   | <a href="#">AB184759.1</a> |
| Streptomyces mediolani gene for 16S rRNA, partial sequence, strain: NBRC 15427                  | 2654      | 2654        | 98%         | 0.0     | 99%   | <a href="#">AB184674.1</a> |
| Streptomyces olivoviridis strain CGMCC 4.1739 clone 5 16S ribosomal RNA gene, complete sequence | 2652      | 2652        | 99%         | 0.0     | 99%   | <a href="#">JQ924396.1</a> |
| Streptomyces olivoviridis strain CGMCC 4.1739 clone 4 16S ribosomal RNA gene, complete sequence | 2652      | 2652        | 99%         | 0.0     | 99%   | <a href="#">JQ924395.1</a> |
| Kitasatospora albolonga strain YIM 101047, complete genome                                      | 2651      | 15858       | 99%         | 0.0     | 99%   | <a href="#">CP020563.1</a> |
| Streptomyces mutomycini strain CGMCC 4.1747 clone 1 16S ribosomal RNA gene, complete sequence   | 2651      | 2651        | 99%         | 0.0     | 99%   | <a href="#">JQ924397.1</a> |

| Description                                                                                     | Max score | Total score | Query cover | E value | Ident | Accession                  |
|-------------------------------------------------------------------------------------------------|-----------|-------------|-------------|---------|-------|----------------------------|
| Streptomyces flavovirens gene for 16S rRNA, partial sequence, strain: NBRC 3197                 | 2651      | 2651        | 98%         | 0.0     | 99%   | <a href="#">AB184827.1</a> |
| Streptomyces ornatus gene for 16S rRNA, partial sequence, strain: NBRC 13069                    | 2651      | 2651        | 97%         | 0.0     | 99%   | <a href="#">AB184290.1</a> |
| Streptomyces flavogriseus gene for 16S rRNA, partial sequence, strain: NBRC 13040               | 2651      | 2651        | 98%         | 0.0     | 99%   | <a href="#">AB184271.1</a> |
| Streptomyces flavovirens gene for 16S rRNA, partial sequence, strain: NBRC 12771                | 2651      | 2651        | 98%         | 0.0     | 99%   | <a href="#">AB184133.1</a> |
| Streptomyces nitrosporeus strain CGMCC 4.1973 clone 3 16S ribosomal RNA gene, complete sequence | 2649      | 2649        | 99%         | 0.0     | 99%   | <a href="#">JQ924412.1</a> |
| Streptomyces nitrosporeus strain CGMCC 4.1973 clone 1 16S ribosomal RNA gene, complete sequence | 2649      | 2649        | 99%         | 0.0     | 99%   | <a href="#">JQ924411.1</a> |
| Streptomyces olivoviridis strain CGMCC 4.1739 clone 1 16S ribosomal RNA gene, complete sequence | 2647      | 2647        | 99%         | 0.0     | 99%   | <a href="#">JQ924393.1</a> |
| Streptomyces naraensis gene for 16S rRNA, partial sequence, strain: NBRC 13421                  | 2647      | 2647        | 98%         | 0.0     | 99%   | <a href="#">AB184391.2</a> |
| Streptomyces fulvorobeus 16S rRNA gene, type strain LMG 19901                                   | 2647      | 2647        | 97%         | 0.0     | 99%   | <a href="#">AJ781331.1</a> |
| Streptomyces parvus gene for 16S rRNA, partial sequence, strain: NBRC 14599                     | 2643      | 2643        | 98%         | 0.0     | 99%   | <a href="#">AB184603.1</a> |
| Streptomyces setonii gene for 16S rRNA, partial sequence, strain: NBRC 13085                    | 2643      | 2643        | 97%         | 0.0     | 99%   | <a href="#">AB184300.1</a> |

## Alignments

Streptomyces griseus subsp. griseus NBRC 13350 DNA, complete genome  
Sequence ID: **AP009493.1** Length: 8545929 Number of Matches: 6  
Range 1: 2102343 to 2103819

| Score           | Expect | Identities     | Gaps       | Strand    | Frame |
|-----------------|--------|----------------|------------|-----------|-------|
| 2721 bits(1473) | 0.0()  | 1476/1477(99%) | 1/1477(0%) | Plus/Plus |       |

Features:

### rRNA-16S ribosomal RNA

|       |         |                                                                  |         |
|-------|---------|------------------------------------------------------------------|---------|
| Query | 1       | GTTACGACTTCGT-CCAATCGCCAGTCCCACCTTCGACAGCTCCCTCCCACAAGGGGTTG     | 59      |
| Sbjct | 2102343 | <br>GTTACGACTTCGTCCCAATCGCCAGTCCCACCTTCGACAGCTCCCTCCCACAAGGGGTTG | 2102402 |
| Query | 60      | GGCCACCGGCTTCGGGTGTTACCGACTTTCGTGACGTGACGGGCGGTGTGTACAAGGCC      | 119     |
| Sbjct | 2102403 | <br>GGCCACCGGCTTCGGGTGTTACCGACTTTCGTGACGTGACGGGCGGTGTGTACAAGGCC  | 2102462 |
| Query | 120     | GGGAACGTATTACCCGACGAAATGCTGATCTGCGATTACTAGCAACTCCGACTTCATGGG     | 179     |
| Sbjct | 2102463 | <br>GGGAACGTATTACCCGACGAAATGCTGATCTGCGATTACTAGCAACTCCGACTTCATGGG | 2102522 |
| Query | 180     | GTCGAGTTGCAGACCCCAATCCGAACGAGACCGGCTTTTTGAGATTTCGCTCCGCCTCGC     | 239     |
| Sbjct | 2102523 | <br>GTCGAGTTGCAGACCCCAATCCGAACGAGACCGGCTTTTTGAGATTTCGCTCCGCCTCGC | 2102582 |
| Query | 240     | GGCATCGCAGCTCATTGTACCGCCATTGTAGCACGTGTGCAGCCCAAGACATAAGGGGC      | 299     |
| Sbjct | 2102583 | <br>GGCATCGCAGCTCATTGTACCGCCATTGTAGCACGTGTGCAGCCCAAGACATAAGGGGC  | 2102642 |
| Query | 300     | ATGATGACTTGACGTCGTCCCCACCTTCCTCCGAGTTGACCCCGGCAGTCTCCTGTGAGT     | 359     |
| Sbjct | 2102643 | <br>ATGATGACTTGACGTCGTCCCCACCTTCCTCCGAGTTGACCCCGGCAGTCTCCTGTGAGT | 2102702 |
| Query | 360     | CCCCATCACCCCGAAGGGCATGCTGGCAACACAGAACAAGGGTTGCGCTCGTTGCGGGAC     | 419     |
| Sbjct | 2102703 | <br>CCCCATCACCCCGAAGGGCATGCTGGCAACACAGAACAAGGGTTGCGCTCGTTGCGGGAC | 2102762 |
| Query | 420     | TTAACCCAACATCTCACGACACGAGCTGACGACAGCCATGCACCACCTGTATACCGACCA     | 479     |

### BLAST Results

[Questions/comments](#)

**Job title:** 4\_1525

**RID** [TYT8A0E301R](#) (Expires on 09-18 16:25 pm)

**Query ID** lcl|Query\_130761  
**Description** 4\_1525  
**Molecule type** nucleic acid  
**Query Length** 1476

**Database Name** nr  
**Description** Nucleotide collection (nt)  
**Program** BLASTN 2.8.0+

### Graphic Summary

**Distribution of the top 190 Blast Hits on 100 subject sequences**

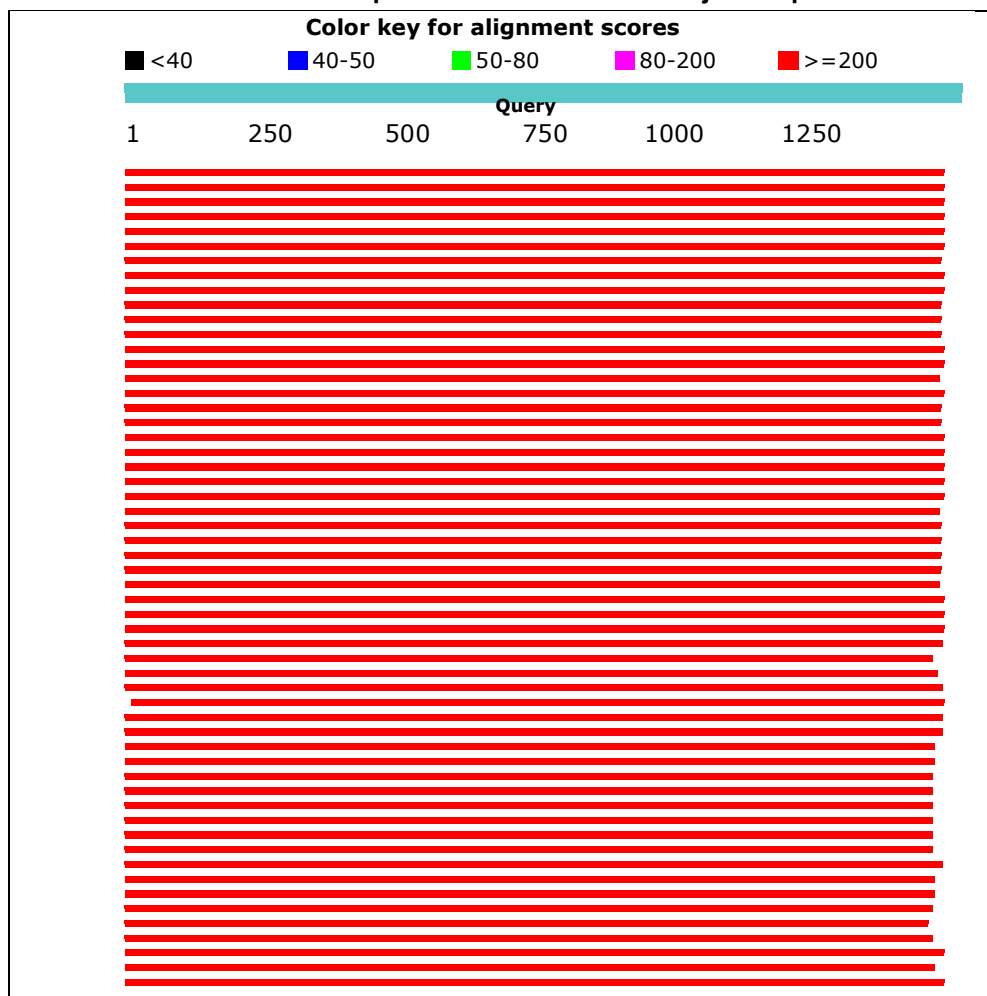

## Descriptions

Sequences producing significant alignments:

| Description                                                                                           | Max score | Total score | Query cover | E value | Ident | Accession                   |
|-------------------------------------------------------------------------------------------------------|-----------|-------------|-------------|---------|-------|-----------------------------|
| <i>Streptomyces griseus</i> subsp. <i>griseus</i> NBRC 13350 DNA, complete genome                     | 2721      | 16327       | 100%        | 0.0     | 99%   | <a href="#">AP009493.1</a>  |
| <i>Streptomyces pratensis</i> ATCC 33331, complete genome                                             | 2715      | 16238       | 100%        | 0.0     | 99%   | <a href="#">CP002475.1</a>  |
| <i>Streptomyces globisporus</i> strain TFH56 chromosome, complete genome                              | 2710      | 16238       | 100%        | 0.0     | 99%   | <a href="#">CP029361.1</a>  |
| <i>Streptomyces fulvissimus</i> strain DSM 40593 16S ribosomal RNA, partial sequence                  | 2710      | 2710        | 100%        | 0.0     | 99%   | <a href="#">NR_103947.1</a> |
| <i>Streptomyces fulvissimus</i> DSM 40593, complete genome                                            | 2710      | 16260       | 100%        | 0.0     | 99%   | <a href="#">CP005080.1</a>  |
| <i>Streptomyces</i> sp. PAMC26508, complete genome                                                    | 2710      | 16257       | 100%        | 0.0     | 99%   | <a href="#">CP003990.1</a>  |
| <i>Streptomyces pratensis</i> strain ch24 16S ribosomal RNA, partial sequence                         | 2706      | 2706        | 99%         | 0.0     | 99%   | <a href="#">NR_125621.1</a> |
| <i>Streptomyces globisporus</i> C-1027, complete genome                                               | 2704      | 16227       | 100%        | 0.0     | 99%   | <a href="#">CP013738.1</a>  |
| <i>Streptomyces luridiscabiei</i> strain S63 16S ribosomal RNA, partial sequence                      | 2704      | 2704        | 100%        | 0.0     | 99%   | <a href="#">NR_025155.1</a> |
| <i>Streptomyces flavolimosus</i> strain CGMCC 2027 16S ribosomal RNA gene, partial sequence           | 2702      | 2702        | 99%         | 0.0     | 99%   | <a href="#">EF688620.1</a>  |
| <i>Streptomyces praecox</i> strain CGMCC 4.1782 clone 3 16S ribosomal RNA gene, complete sequence     | 2700      | 2700        | 99%         | 0.0     | 99%   | <a href="#">JQ924404.1</a>  |
| <i>Streptomyces pratensis</i> strain ch24 16S ribosomal RNA, partial sequence                         | 2700      | 2700        | 99%         | 0.0     | 99%   | <a href="#">NR_125619.1</a> |
| <i>Streptomyces</i> sp. SM18 chromosome, complete genome                                              | 2699      | 16183       | 100%        | 0.0     | 99%   | <a href="#">CP029342.1</a>  |
| <i>Streptomyces flavofuscus</i> strain CGMCC 4.1938 clone 3 16S ribosomal RNA gene, complete sequence | 2699      | 2699        | 99%         | 0.0     | 99%   | <a href="#">JQ924409.1</a>  |
| <i>Streptomyces griseus</i> strain NRRL B-8030 16S ribosomal RNA gene, partial sequence               | 2699      | 2699        | 99%         | 0.0     | 99%   | <a href="#">DQ026671.1</a>  |
| <i>Streptomyces</i> sp. Tue6075, complete genome                                                      | 2695      | 16157       | 100%        | 0.0     | 99%   | <a href="#">CP010833.1</a>  |
| <i>Streptomyces praecox</i> strain CGMCC 4.1782 clone 2 16S ribosomal RNA gene, complete sequence     | 2695      | 2695        | 99%         | 0.0     | 99%   | <a href="#">JQ924403.1</a>  |
| <i>Streptomyces pratensis</i> strain ch24 16S ribosomal RNA, partial sequence                         | 2695      | 2695        | 99%         | 0.0     | 99%   | <a href="#">NR_125618.1</a> |
| <i>Streptomyces violaceoruber</i> strain S21, complete genome                                         | 2693      | 16161       | 100%        | 0.0     | 99%   | <a href="#">CP020570.1</a>  |
| <i>Streptomyces flavofuscus</i> strain CGMCC 4.1938 clone 2 16S ribosomal RNA gene, complete sequence | 2693      | 2693        | 99%         | 0.0     | 99%   | <a href="#">JQ924408.1</a>  |
| <i>Streptomyces flavofuscus</i> strain CGMCC 4.1938 clone 1 16S ribosomal RNA gene, complete sequence | 2693      | 2693        | 99%         | 0.0     | 99%   | <a href="#">JQ924407.1</a>  |
| <i>Streptomyces</i> sp. SirexAA-E, complete genome                                                    | 2693      | 16133       | 100%        | 0.0     | 99%   | <a href="#">CP002993.1</a>  |
| <i>Streptomyces flavofuscus</i> strain NRRL B-2594 16S ribosomal RNA gene, partial sequence           | 2691      | 2691        | 100%        | 0.0     | 99%   | <a href="#">EF178690.1</a>  |

| Description                                                                                             | Max score | Total score | Query cover | E value | Ident | Accession                   |
|---------------------------------------------------------------------------------------------------------|-----------|-------------|-------------|---------|-------|-----------------------------|
| Streptomyces microflavus strain NRRL B-2156 16S ribosomal RNA gene, partial sequence                    | 2691      | 2691        | 99%         | 0.0     | 99%   | <a href="#">DQ445795.1</a>  |
| Streptomyces praecox strain CGMCC 4.1782 clone 5 16S ribosomal RNA gene, complete sequence              | 2689      | 2689        | 99%         | 0.0     | 99%   | <a href="#">JQ924406.1</a>  |
| Streptomyces praecox strain CGMCC 4.1782 clone 4 16S ribosomal RNA gene, complete sequence              | 2689      | 2689        | 99%         | 0.0     | 99%   | <a href="#">JQ924405.1</a>  |
| Streptomyces praecox strain CGMCC 4.1782 clone 1 16S ribosomal RNA gene, complete sequence              | 2689      | 2689        | 99%         | 0.0     | 99%   | <a href="#">JQ924402.1</a>  |
| Streptomyces pratensis strain ch24 16S ribosomal RNA, partial sequence                                  | 2689      | 2689        | 99%         | 0.0     | 99%   | <a href="#">NR_125620.1</a> |
| Streptomyces anulatus strain NRRL B-2000 16S ribosomal RNA gene, partial sequence                       | 2689      | 2689        | 99%         | 0.0     | 99%   | <a href="#">DQ026637.1</a>  |
| Streptomyces flavogriseus partial 16S rRNA gene, type strain CBS 101.34T                                | 2687      | 2687        | 100%        | 0.0     | 99%   | <a href="#">AJ494864.1</a>  |
| Streptomyces baarnensis strain NRRL B-1902 16S ribosomal RNA gene, partial sequence                     | 2686      | 2686        | 100%        | 0.0     | 99%   | <a href="#">EF178688.1</a>  |
| Streptomyces sp. CFMR 7 strain CFMR-7, complete genome                                                  | 2682      | 15924       | 100%        | 0.0     | 99%   | <a href="#">CP011522.1</a>  |
| Streptomyces flavovirens strain CGMCC 4.575 clone 1 16S ribosomal RNA gene, complete sequence           | 2682      | 2682        | 99%         | 0.0     | 99%   | <a href="#">JQ924386.1</a>  |
| Streptomyces griseus subsp. griseus gene for 16S rRNA, partial sequence, strain: NBRC 15744             | 2680      | 2680        | 98%         | 0.0     | 99%   | <a href="#">AB184699.1</a>  |
| Streptomyces argenteolus strain JCM 4623 16S ribosomal RNA, partial sequence                            | 2680      | 2680        | 99%         | 0.0     | 99%   | <a href="#">NR_112120.1</a> |
| Streptomyces flavovirens strain CGMCC 4.575 clone 2 16S ribosomal RNA gene, complete sequence           | 2678      | 2678        | 99%         | 0.0     | 99%   | <a href="#">JQ924387.1</a>  |
| Streptomyces sp. YM5-799 gene for 16S rRNA, partial sequence                                            | 2678      | 2678        | 99%         | 0.0     | 99%   | <a href="#">AB534176.1</a>  |
| Streptomyces flavovirens strain CGMCC 4.575 clone 5 16S ribosomal RNA gene, complete sequence           | 2676      | 2676        | 99%         | 0.0     | 99%   | <a href="#">JQ924389.1</a>  |
| Streptomyces flavovirens strain CGMCC 4.575 clone 4 16S ribosomal RNA gene, complete sequence           | 2676      | 2676        | 99%         | 0.0     | 99%   | <a href="#">JQ924388.1</a>  |
| Streptomyces microflavus strain NRRL B-1332 16S ribosomal RNA gene, partial sequence                    | 2675      | 2675        | 98%         | 0.0     | 99%   | <a href="#">EF178673.1</a>  |
| Streptomyces paresii 16S rRNA gene, type strain LMG 23704T                                              | 2675      | 2675        | 98%         | 0.0     | 99%   | <a href="#">AJ969177.1</a>  |
| Streptomyces anulatus gene for 16S rRNA, partial sequence, strain: NBRC 13369                           | 2673      | 2673        | 98%         | 0.0     | 99%   | <a href="#">AB184875.1</a>  |
| Streptomyces cavourensis subsp. washingtonensis gene for 16S rRNA, partial sequence, strain: NBRC 15391 | 2673      | 2673        | 98%         | 0.0     | 99%   | <a href="#">AB184642.1</a>  |
| Streptomyces acidoresistans gene for 16S rRNA, partial sequence, strain: NBRC 13442                     | 2673      | 2673        | 98%         | 0.0     | 99%   | <a href="#">AB184406.1</a>  |
| Streptomyces praecox gene for 16S rRNA, partial sequence, strain: NBRC 13073                            | 2673      | 2673        | 98%         | 0.0     | 99%   | <a href="#">AB184293.1</a>  |
| Streptomyces albobiridis gene for 16S rRNA, partial sequence, strain: NBRC 13013                        | 2673      | 2673        | 98%         | 0.0     | 99%   | <a href="#">AB184256.1</a>  |

| Description                                                                                             | Max score | Total score | Query cover | E value | Ident | Accession                  |
|---------------------------------------------------------------------------------------------------------|-----------|-------------|-------------|---------|-------|----------------------------|
| Streptomyces argenteolus gene for 16S rRNA, partial sequence, strain: NBRC 12841                        | 2673      | 2673        | 98%         | 0.0     | 99%   | <a href="#">AB184187.1</a> |
| Streptomyces finlayi strain CGMCC 4.1436 clone 1 16S ribosomal RNA gene, complete sequence              | 2669      | 2669        | 99%         | 0.0     | 99%   | <a href="#">JQ924390.1</a> |
| Streptomyces rubiginosohelvolus gene for 16S rRNA, partial sequence, strain: NBRC 12912                 | 2669      | 2669        | 98%         | 0.0     | 99%   | <a href="#">AB184240.2</a> |
| Streptomyces microflavus gene for 16S rRNA, partial sequence, strain: NBRC 13062                        | 2669      | 2669        | 98%         | 0.0     | 99%   | <a href="#">AB184284.1</a> |
| Streptomyces fulvorobeus gene for 16S rRNA, partial sequence, strain: NBRC 15897                        | 2667      | 2667        | 98%         | 0.0     | 99%   | <a href="#">AB184711.1</a> |
| Streptomyces griseus subsp. griseus gene for 16S rRNA, partial sequence, strain: NBRC 12875             | 2667      | 2667        | 98%         | 0.0     | 99%   | <a href="#">AB184211.1</a> |
| Streptomyces griseinus gene for 16S rRNA, partial sequence, strain: NBRC 12869                          | 2667      | 2667        | 98%         | 0.0     | 99%   | <a href="#">AB184205.1</a> |
| Streptomyces sp. S8, complete genome                                                                    | 2665      | 15950       | 100%        | 0.0     | 99%   | <a href="#">CP015362.1</a> |
| Streptomyces flavofuscus gene for 16S rRNA, partial sequence, strain: NBRC 100768                       | 2665      | 2665        | 98%         | 0.0     | 99%   | <a href="#">AB249935.1</a> |
| Streptomyces clavifer strain NRRL B-2557 16S ribosomal RNA gene, partial sequence                       | 2663      | 2663        | 99%         | 0.0     | 99%   | <a href="#">DQ026670.1</a> |
| Streptomyces albovinaceus gene for 16S rRNA, partial sequence, strain: NBRC 12739                       | 2663      | 2663        | 98%         | 0.0     | 99%   | <a href="#">AB249958.1</a> |
| Streptomyces erumpens gene for 16S rRNA, partial sequence, strain: NBRC 15403                           | 2663      | 2663        | 97%         | 0.0     | 99%   | <a href="#">AB184654.1</a> |
| Streptomyces baarnensis gene for 16S rRNA, partial sequence, strain: NBRC 14727                         | 2663      | 2663        | 98%         | 0.0     | 99%   | <a href="#">AB184615.1</a> |
| Streptomyces fimicarius gene for 16S rRNA, partial sequence, strain: NBRC 13037                         | 2663      | 2663        | 98%         | 0.0     | 99%   | <a href="#">AB184269.1</a> |
| Streptomyces globisporus subsp. globisporus gene for 16S rRNA, partial sequence, strain: NBRC 12867     | 2663      | 2663        | 98%         | 0.0     | 99%   | <a href="#">AB184203.1</a> |
| Streptomyces cavourensis strain TJ430 chromosome, complete genome                                       | 2662      | 15856       | 100%        | 0.0     | 99%   | <a href="#">CP030930.1</a> |
| Streptomyces bacillaris strain ATCC 15855 chromosome, complete genome                                   | 2662      | 15972       | 100%        | 0.0     | 99%   | <a href="#">CP029378.1</a> |
| Streptomyces cavourensis strain 1AS2a chromosome, complete genome                                       | 2662      | 15928       | 100%        | 0.0     | 99%   | <a href="#">CP024957.1</a> |
| Streptomyces globisporus subsp. globisporus strain NRRL B-2872 16S ribosomal RNA gene, partial sequence | 2662      | 2662        | 98%         | 0.0     | 99%   | <a href="#">EF178686.1</a> |
| Streptomyces griseolus gene for 16S rRNA, partial sequence, strain: NBRC 3415                           | 2662      | 2662        | 98%         | 0.0     | 99%   | <a href="#">AB184768.1</a> |
| Streptomyces puniceus gene for 16S rRNA, partial sequence, strain: NBRC 12811                           | 2662      | 2662        | 98%         | 0.0     | 99%   | <a href="#">AB184163.1</a> |
| Streptomyces halstedii gene for 16S rRNA, partial sequence, strain: NBRC 12783                          | 2662      | 2662        | 98%         | 0.0     | 99%   | <a href="#">AB184142.1</a> |

| Description                                                                                     | Max score | Total score | Query cover | E value | Ident | Accession                  |
|-------------------------------------------------------------------------------------------------|-----------|-------------|-------------|---------|-------|----------------------------|
| Streptomyces atratus strain SCSIO_ZH16 chromosome, complete genome                              | 2660      | 15961       | 100%        | 0.0     | 99%   | <a href="#">CP027306.1</a> |
| Streptomyces flavovirens strain NRRL B-2685 16S ribosomal RNA gene, partial sequence            | 2660      | 2660        | 99%         | 0.0     | 99%   | <a href="#">DQ026635.1</a> |
| Streptomyces pluricolaroscens gene for 16S rRNA, partial sequence, strain: NBRC 12808           | 2660      | 2660        | 98%         | 0.0     | 99%   | <a href="#">AB184162.1</a> |
| Streptomyces olivoviridis strain CGMCC 4.1739 clone 2 16S ribosomal RNA gene, complete sequence | 2658      | 2658        | 99%         | 0.0     | 99%   | <a href="#">JQ924394.1</a> |
| Streptomyces finlayi strain CGMCC 4.1436 clone 2 16S ribosomal RNA gene, complete sequence      | 2658      | 2658        | 99%         | 0.0     | 99%   | <a href="#">JQ924391.1</a> |
| Streptomyces californicus gene for 16S rRNA, partial sequence, strain: NBRC 12750               | 2658      | 2658        | 98%         | 0.0     | 99%   | <a href="#">AB184116.2</a> |
| Streptomyces cinereorectus gene for 16S rRNA, partial sequence, strain: NBRC 15395              | 2658      | 2658        | 98%         | 0.0     | 99%   | <a href="#">AB184646.1</a> |
| Streptomyces mutomycini strain CGMCC 4.1747 clone 3 16S ribosomal RNA gene, complete sequence   | 2656      | 2656        | 99%         | 0.0     | 99%   | <a href="#">JQ924399.1</a> |
| Streptomyces halstedii strain NRRL B-1238 16S ribosomal RNA gene, partial sequence              | 2656      | 2656        | 98%         | 0.0     | 99%   | <a href="#">EF178695.1</a> |
| Streptomyces parvus gene for 16S rRNA, partial sequence, strain: NBRC 3388                      | 2656      | 2656        | 98%         | 0.0     | 99%   | <a href="#">AB184756.1</a> |
| Streptomyces californicus gene for 16S rRNA, partial sequence, strain: NBRC 3386                | 2656      | 2656        | 98%         | 0.0     | 99%   | <a href="#">AB184755.1</a> |
| Streptomyces badius gene for 16S rRNA, partial sequence, strain: NBRC 12745                     | 2656      | 2656        | 98%         | 0.0     | 99%   | <a href="#">AB184114.1</a> |
| Streptomyces lunaelactis strain MM109 chromosome, complete genome                               | 2654      | 15660       | 100%        | 0.0     | 99%   | <a href="#">CP026304.1</a> |
| Streptomyces nitrosporeus strain CGMCC 4.1973 clone 4 16S ribosomal RNA gene, complete sequence | 2654      | 2654        | 99%         | 0.0     | 99%   | <a href="#">JQ924413.1</a> |
| Streptomyces anulatus strain NRRL B-2873 16S ribosomal RNA gene, partial sequence               | 2654      | 2654        | 97%         | 0.0     | 99%   | <a href="#">DQ026639.1</a> |
| Streptomyces sindenensis gene for 16S rRNA, partial sequence, strain: NBRC 3399                 | 2654      | 2654        | 98%         | 0.0     | 99%   | <a href="#">AB184759.1</a> |
| Streptomyces mediolani gene for 16S rRNA, partial sequence, strain: NBRC 15427                  | 2654      | 2654        | 98%         | 0.0     | 99%   | <a href="#">AB184674.1</a> |
| Streptomyces olivoviridis strain CGMCC 4.1739 clone 5 16S ribosomal RNA gene, complete sequence | 2652      | 2652        | 99%         | 0.0     | 99%   | <a href="#">JQ924396.1</a> |
| Streptomyces olivoviridis strain CGMCC 4.1739 clone 4 16S ribosomal RNA gene, complete sequence | 2652      | 2652        | 99%         | 0.0     | 99%   | <a href="#">JQ924395.1</a> |
| Kitasatospora albolonga strain YIM 101047, complete genome                                      | 2651      | 15858       | 100%        | 0.0     | 99%   | <a href="#">CP020563.1</a> |
| Streptomyces mutomycini strain CGMCC 4.1747 clone 1 16S ribosomal RNA gene, complete sequence   | 2651      | 2651        | 99%         | 0.0     | 99%   | <a href="#">JQ924397.1</a> |



| Description                                                                                     | Max score | Total score | Query cover | E value | Ident | Accession                  |
|-------------------------------------------------------------------------------------------------|-----------|-------------|-------------|---------|-------|----------------------------|
| Streptomyces flavovirens gene for 16S rRNA, partial sequence, strain: NBRC 3197                 | 2651      | 2651        | 98%         | 0.0     | 99%   | <a href="#">AB184827.1</a> |
| Streptomyces ornatus gene for 16S rRNA, partial sequence, strain: NBRC 13069                    | 2651      | 2651        | 97%         | 0.0     | 99%   | <a href="#">AB184290.1</a> |
| Streptomyces flavogriseus gene for 16S rRNA, partial sequence, strain: NBRC 13040               | 2651      | 2651        | 98%         | 0.0     | 99%   | <a href="#">AB184271.1</a> |
| Streptomyces flavovirens gene for 16S rRNA, partial sequence, strain: NBRC 12771                | 2651      | 2651        | 98%         | 0.0     | 99%   | <a href="#">AB184133.1</a> |
| Streptomyces nitrosporeus strain CGMCC 4.1973 clone 3 16S ribosomal RNA gene, complete sequence | 2649      | 2649        | 99%         | 0.0     | 99%   | <a href="#">JQ924412.1</a> |
| Streptomyces nitrosporeus strain CGMCC 4.1973 clone 1 16S ribosomal RNA gene, complete sequence | 2649      | 2649        | 99%         | 0.0     | 99%   | <a href="#">JQ924411.1</a> |
| Streptomyces olivoviridis strain CGMCC 4.1739 clone 1 16S ribosomal RNA gene, complete sequence | 2647      | 2647        | 99%         | 0.0     | 99%   | <a href="#">JQ924393.1</a> |
| Streptomyces naraensis gene for 16S rRNA, partial sequence, strain: NBRC 13421                  | 2647      | 2647        | 98%         | 0.0     | 99%   | <a href="#">AB184391.2</a> |
| Streptomyces fulvorobeus 16S rRNA gene, type strain LMG 19901                                   | 2647      | 2647        | 97%         | 0.0     | 99%   | <a href="#">AJ781331.1</a> |
| Streptomyces parvus gene for 16S rRNA, partial sequence, strain: NBRC 14599                     | 2643      | 2643        | 98%         | 0.0     | 99%   | <a href="#">AB184603.1</a> |
| Streptomyces setonii gene for 16S rRNA, partial sequence, strain: NBRC 13085                    | 2643      | 2643        | 97%         | 0.0     | 99%   | <a href="#">AB184300.1</a> |

## Alignments

Streptomyces griseus subsp. griseus NBRC 13350 DNA, complete genome  
Sequence ID: **AP009493.1** Length: 8545929 Number of Matches: 6  
Range 1: 2102343 to 2103819

| Score           | Expect | Identities     | Gaps       | Strand    | Frame |
|-----------------|--------|----------------|------------|-----------|-------|
| 2721 bits(1473) | 0.0()  | 1476/1477(99%) | 1/1477(0%) | Plus/Plus |       |

Features:

### rRNA-16S ribosomal RNA

|       |         |                                                                   |         |
|-------|---------|-------------------------------------------------------------------|---------|
| Query | 1       | GTTACGACTTCGT-CCAATCGCCAGTCCCACCTTCGACAGCTCCCTCCCACAAGGGGTTG      | 59      |
| Sbjct | 2102343 | <br>GTTACGACTTCGTCCCAATCGCCAGTCCCACCTTCGACAGCTCCCTCCCACAAGGGGTTG  | 2102402 |
| Query | 60      | GGCCACCGGCTTCGGGTGTTACCGACTTTCGTGACGTGACGGGCGGTGTGTACAAGGCC       | 119     |
| Sbjct | 2102403 | <br>GGCCACCGGCTTCGGGTGTTACCGACTTTCGTGACGTGACGGGCGGTGTGTACAAGGCC   | 2102462 |
| Query | 120     | GGGAACGTATTACCCGAGCAATGCTGATCTGCGATTACTAGCAACTCCGACTTCATGGG       | 179     |
| Sbjct | 2102463 | <br>GGGAACGTATTACCCGAGCAATGCTGATCTGCGATTACTAGCAACTCCGACTTCATGGG   | 2102522 |
| Query | 180     | GTCGAGTTGCAGACCCCAATCCGAAGTACGACCGGCTTTTTGAGATTTCGCTCCGCCTCGC     | 239     |
| Sbjct | 2102523 | <br>GTCGAGTTGCAGACCCCAATCCGAAGTACGACCGGCTTTTTGAGATTTCGCTCCGCCTCGC | 2102582 |
| Query | 240     | GGCATCGCAGCTCATTGTACCGCCATTGTAGCACGTGTGCAGCCCAAGACATAAGGGGC       | 299     |
| Sbjct | 2102583 | <br>GGCATCGCAGCTCATTGTACCGCCATTGTAGCACGTGTGCAGCCCAAGACATAAGGGGC   | 2102642 |
| Query | 300     | ATGATGACTTGACGTCGTCCCCACCTTCCTCCGAGTTGACCCCGGCAGTCTCCTGTGAGT      | 359     |
| Sbjct | 2102643 | <br>ATGATGACTTGACGTCGTCCCCACCTTCCTCCGAGTTGACCCCGGCAGTCTCCTGTGAGT  | 2102702 |
| Query | 360     | CCCCATCACCCCGAAGGGCATGCTGGCAACACAGAACAAGGGTTGCGCTCGTTGCGGGAC      | 419     |
| Sbjct | 2102703 | <br>CCCCATCACCCCGAAGGGCATGCTGGCAACACAGAACAAGGGTTGCGCTCGTTGCGGGAC  | 2102762 |
| Query | 420     | TTAACCCAACATCTCACGACACGAGCTGACGACAGCCATGCACCACCTGTATACCGACCA      | 479     |

# Antibiotic test

| Antibiotic test |                                                                          |
|-----------------|--------------------------------------------------------------------------|
| EI:             | <i>Streptomyces</i> sp. SN25_8.1                                         |
| SG:             | <i>Streptomyces griseus</i> subsp. <i>griseus</i> DSM 40236 <sup>T</sup> |
| ST:             | Streptomycin                                                             |

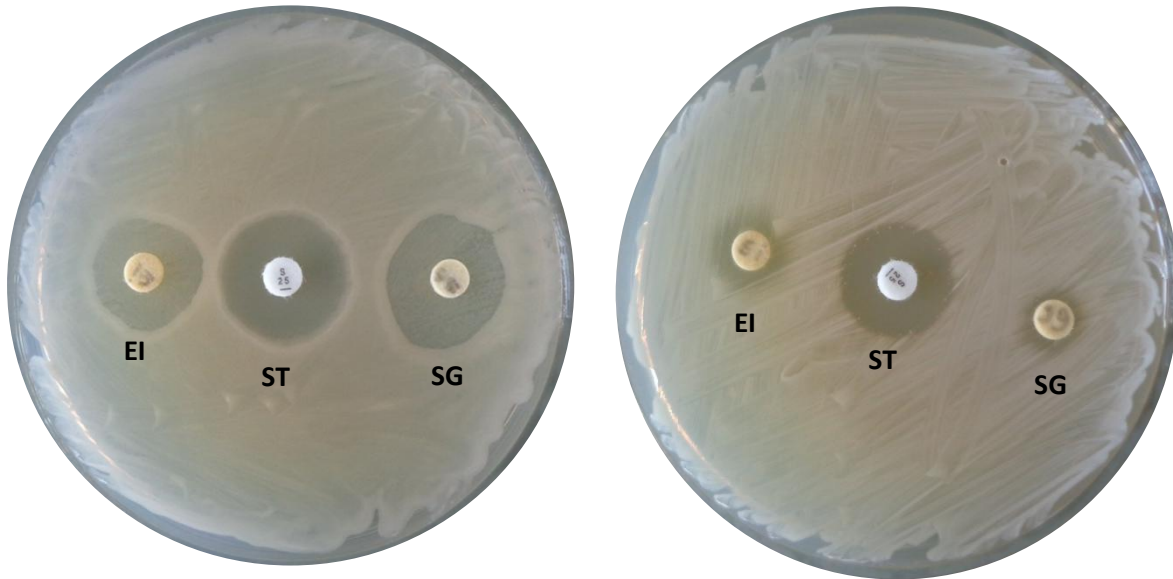

**Antibiotic test** Left plate: *E. coli* DSM 498, Right Plate: *S. lentus* DSM 20352

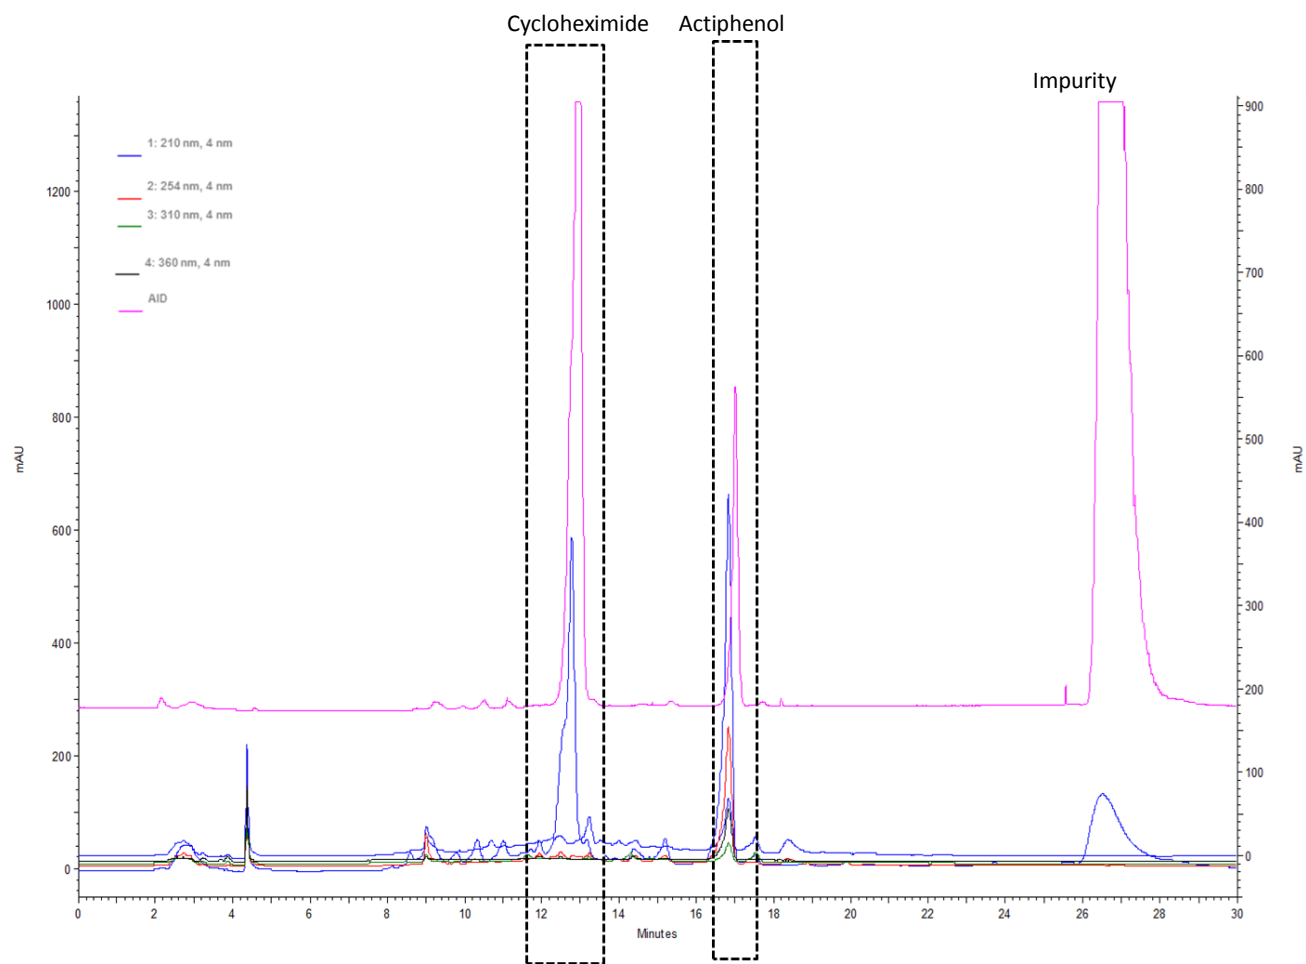

**HPLC –ELSD profile of *Streptomyces* sp. SN25\_8.1.**

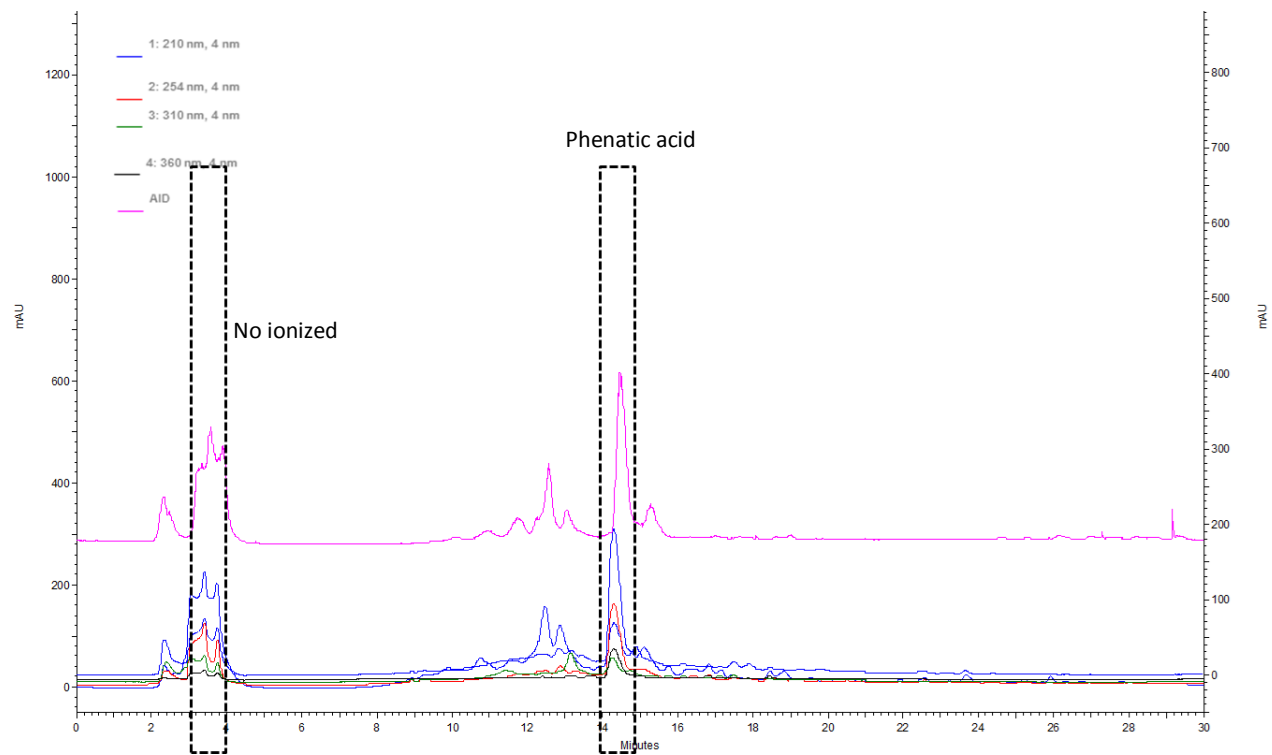

HPLC –ELSD profile of *Streptomyces griseus* subsp. *griseus* DSM 40236<sup>T</sup>.
